# Supplementary material for: Ternary Cu2SnS3: Synthesis, Structure, Photoelectrochemical Activity, and Heterojunction Band Offset and Alignment
Source: PubMed Central journal article supplement (PMC8026117; doi:10.1021/acs.chemmater.0c03223), 2021-03-03
Supplement: cm0c03223_si_001.pdf [file cm0c03223_si_001.pdf]

# Supporting Information

## **Ternary Cu<sub>2</sub>SnS<sub>3</sub>: Synthesis, Structure, Photoelectrochemical Activity, and Heterojunction Band Offset and Alignment**

Sagar B. Jathar<sup>†</sup>, Sachin R. Rondiya<sup>§\*</sup>, Yogesh A. Jadhav<sup>†</sup>, Dhanaraj S. Nilegave<sup>†</sup>, Russell W. Cross<sup>§</sup>, Sunil V. Barma<sup>†</sup>, Mamta P. Nasane<sup>†</sup>, Shankar A. Gaware<sup>†</sup>, Bharat R. Bade<sup>†</sup>, Sandesh R. Jadhkar<sup>†</sup>, Adinath M. Funde<sup>†\*</sup>, Nelson Y. Dzade<sup>§\*</sup>

<sup>†</sup>School of Energy Studies, Savitribai Phule Pune University, Pune 411007, India

<sup>§</sup>School of Chemistry, Cardiff University, Main Building, Park Place, Cardiff, CF10 3AT, Wales, United Kingdom

<sup>†</sup>Department of Physics, Savitribai Phule Pune University, Pune 411007, India

Corresponding Author: RondiyaS@cardiff.ac.uk (SRR), adinathf@gmail.com (AMF), DzadeNY@cardiff.ac.uk (NYD)

The Supporting Information contains 14 Figures (three possible model arrangement of Cu and Sn ions at the 4a sites in CTS; partial density of states (PDOS) of CTS models; crystal structure, PDOS, band structure and effective masses of ZnS and CdS; geometry optimized surface model of CTS(111), CdS(100), and ZnS(110) surfaces used to align the electronic eigenvalues to the vacuum level; EDX spectra and elemental mapping of CTS NPs; SEM images of CTS NPs; chronoamperometry photocurrent stability test for the CTS thin film under illumination of the AM1.5G solar light; X-ray diffraction pattern, Raman spectrum and UV-vis absorbance spectra of CdS and ZnS NPs; and photoanodic behaviour of CdS and ZnS NPs). The relaxed structures with the lattice parameters and atomic positions for the bulk structures, and for the surface slabs generated are also given.

**Figure S1:** Three possible arrangement of Cu and Sn ions at the 4a sites in CTS: (a) Model-1, (b) Model-2, and (c) Model-3. Model-1 is energetically more favourable than Model-2 by 4.54 eV and Model-3 by 11.98 eV. Atomic color: Cu =brown, Sn =pink and S =yellow.

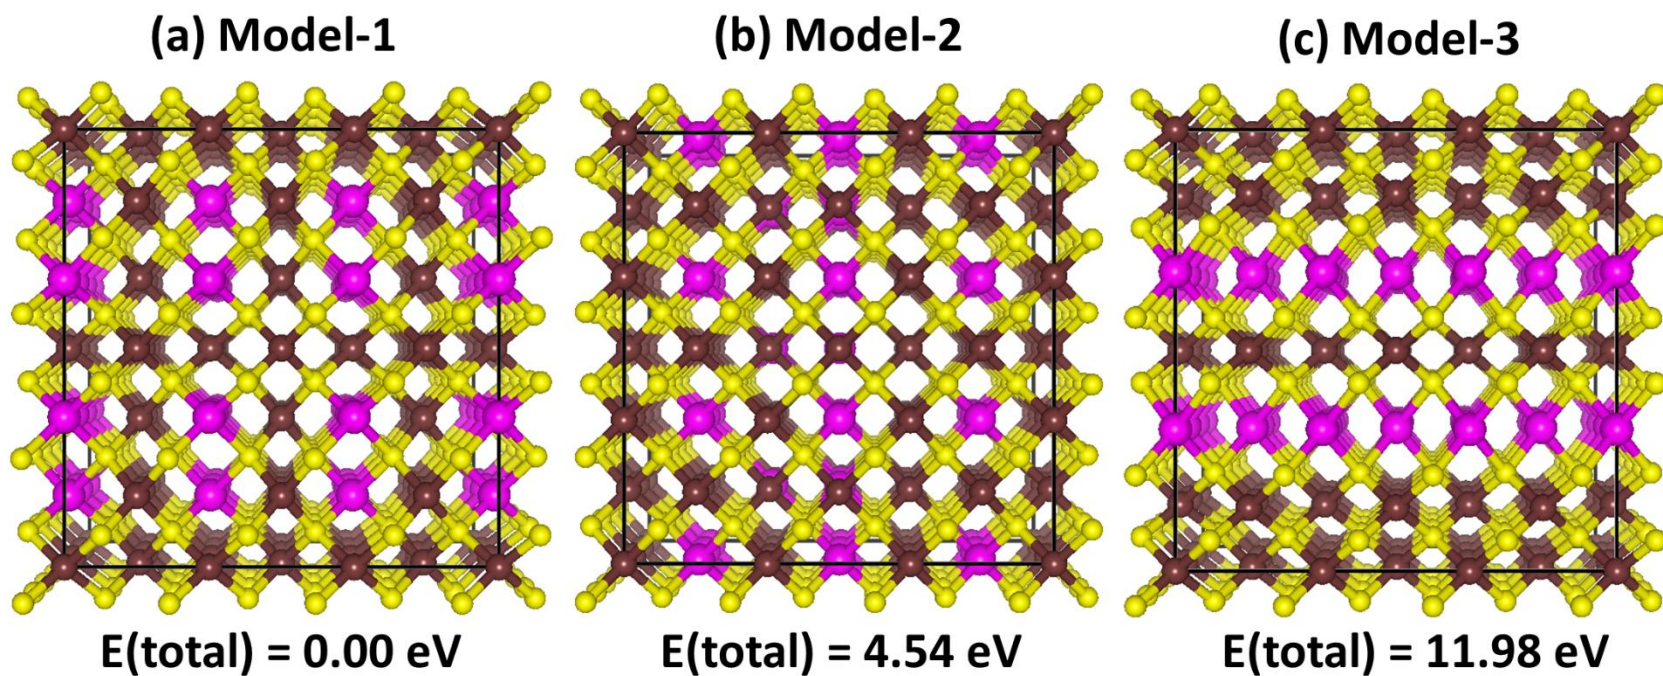

**Figure S2:** The partial density of states of CTS in (a) Model-1, (b) Model-2, and (c) Model-3.

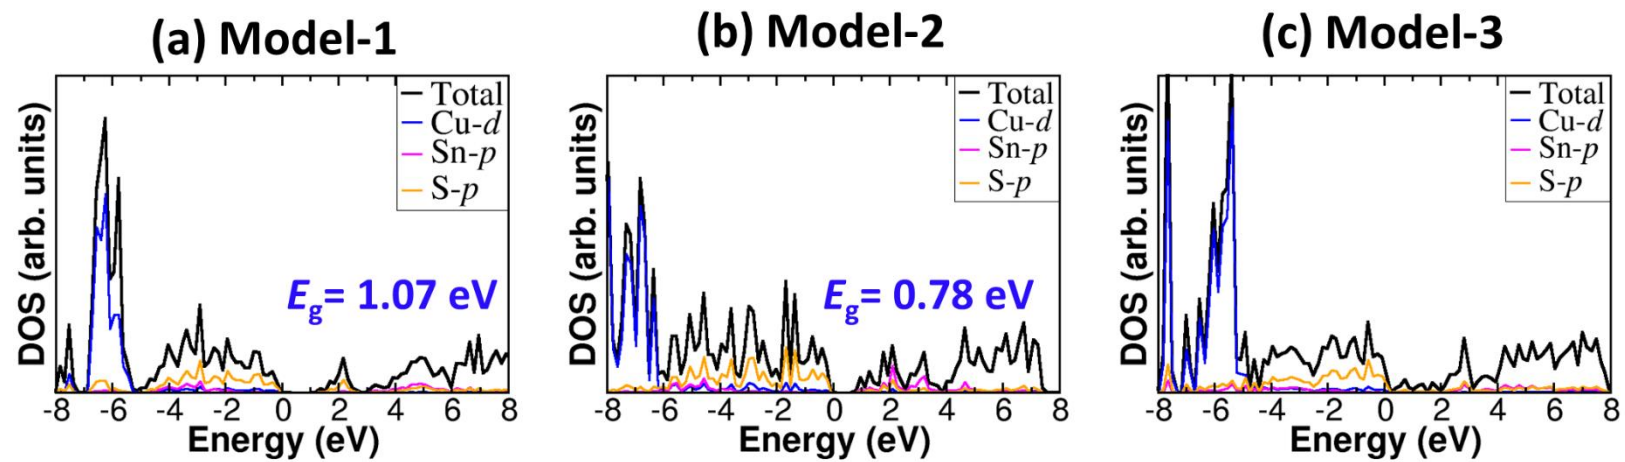

**Figure S3:** (a) Crystal structure, (b) partial density of states (PDOS), and (c) band structure of ZnS. The calculated corresponding effective masses of holes and electrons along the high-symmetry directions of the Brillouin zone are shown in (d). Atomic color: Zn =grey, and S =yellow.

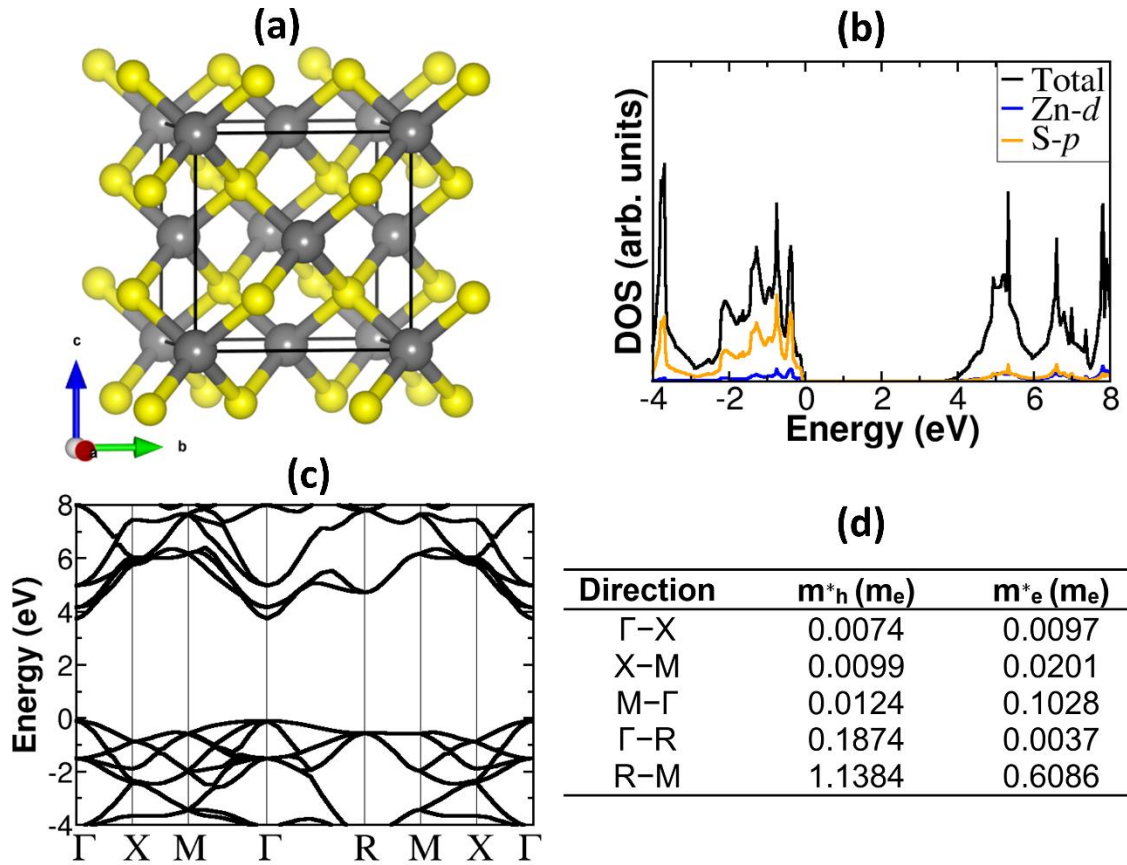

**Figure S4:** (a) Crystal structure, (b) partial density of states (PDOS), and (c) band structure of CdS. The calculated corresponding effective masses of holes and electrons along the high-symmetry directions of the Brillouin zone are shown in (d). Atomic color: Cd =black, and S =yellow.

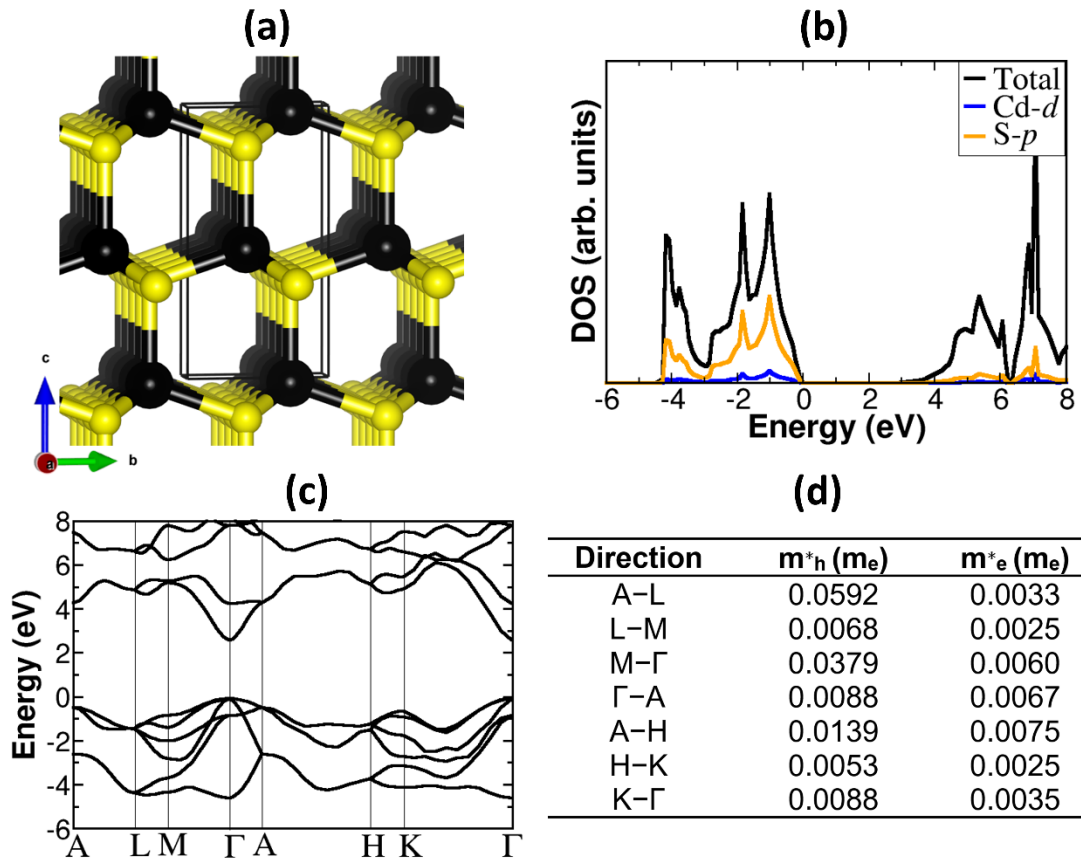

**Figure S5:** Geometry optimized model of the CTS(111) surface used to align the electronic eigenvalues to the vacuum level. The corresponding electrostatic potential is shown in blue.

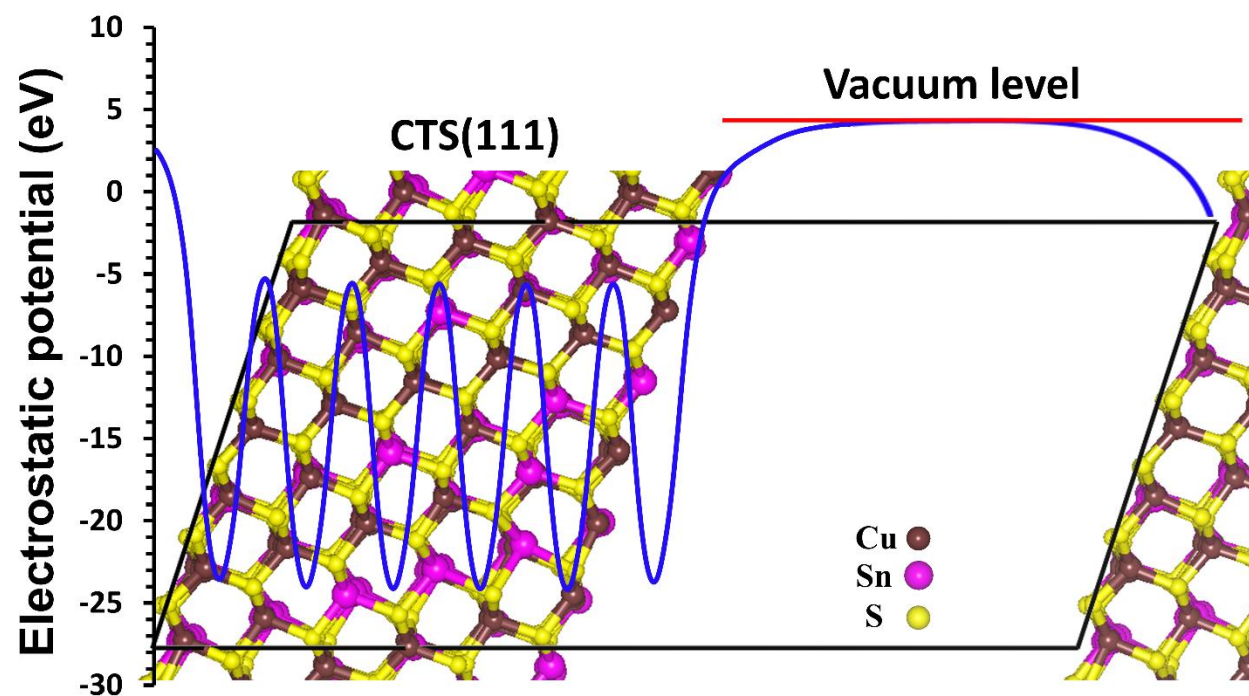

**Figure S6:** Geometry optimized model of the CdS(100) surface used to align the electronic eigenvalues to the vacuum level. The corresponding electrostatic potential is shown in blue.

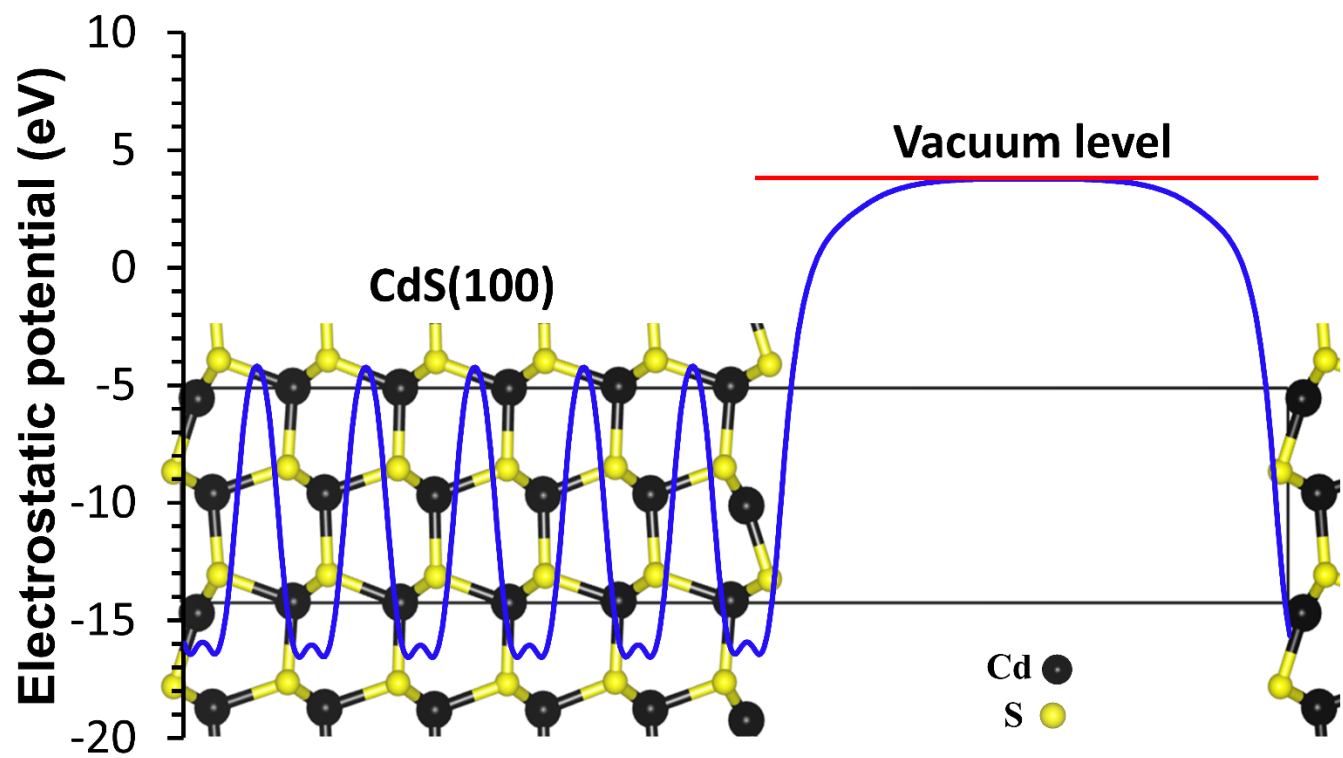

**Figure S7:** Geometry optimized model of the ZnS(110) surface used to align the electronic eigenvalues to the vacuum level. The corresponding electrostatic potential is shown in blue.

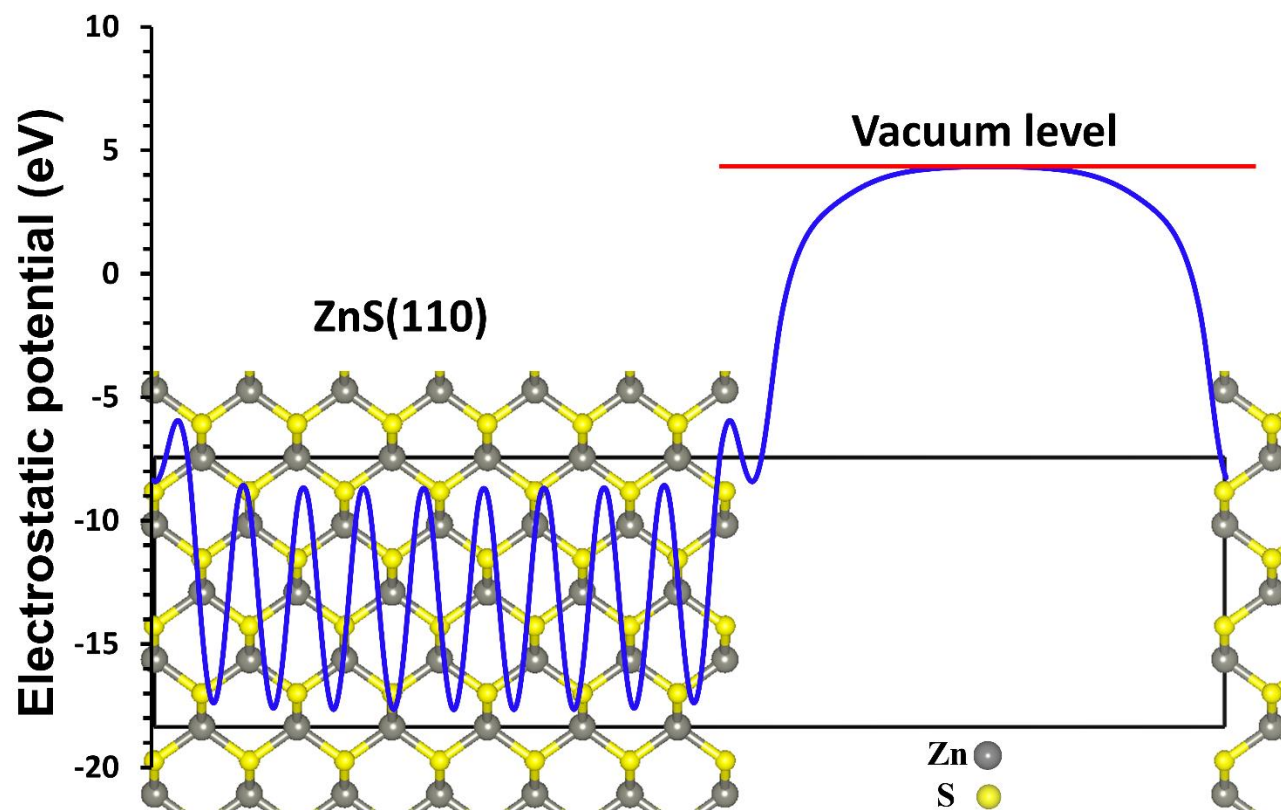



**Figure S8:** (a) EDX spectra of CTS NPs (c, d, e) Elemental mapping of Cu, Sn and S, respectively

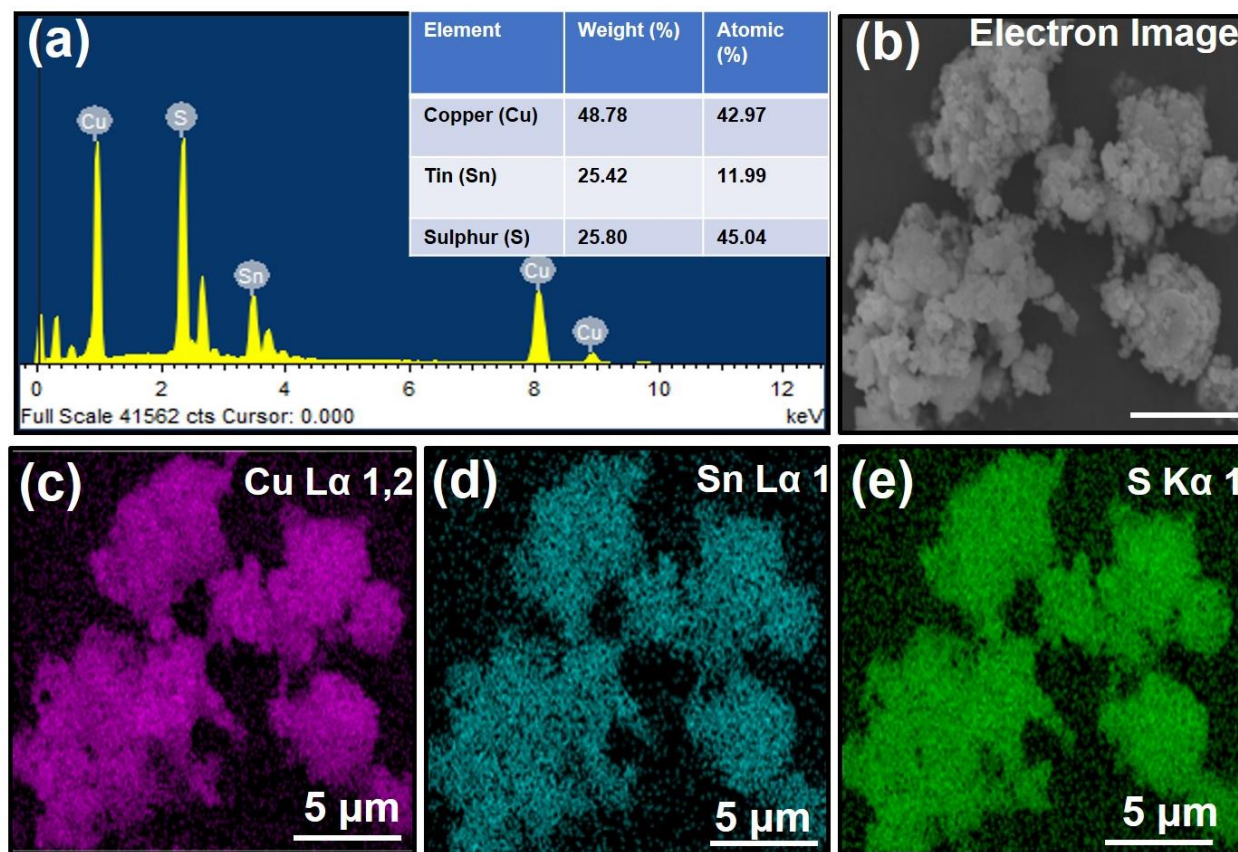

**Figure S9:** (a, b) SEM images of CTS NPs sample at different magnification

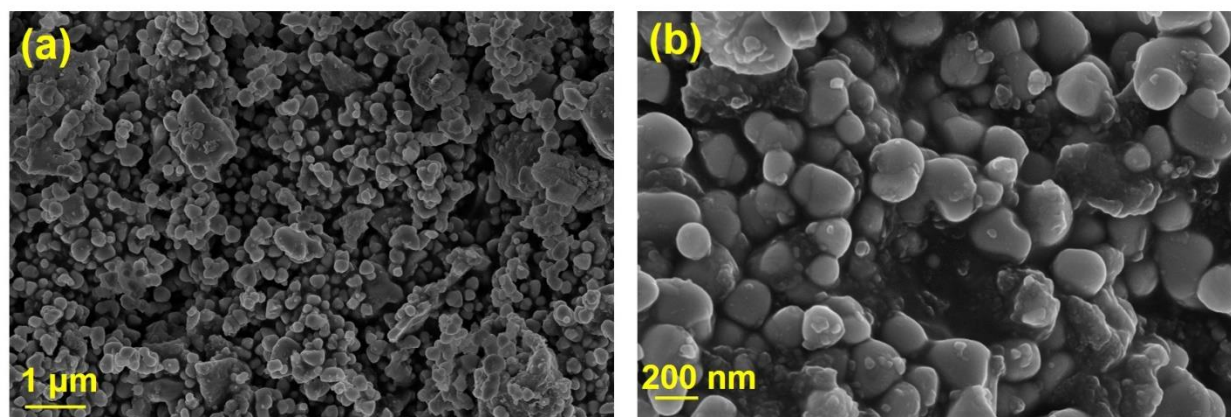

**Figure S10:** Chronoamperometry photocurrent stability test for the CTS thin film under illumination of the AM1.5G solar light.

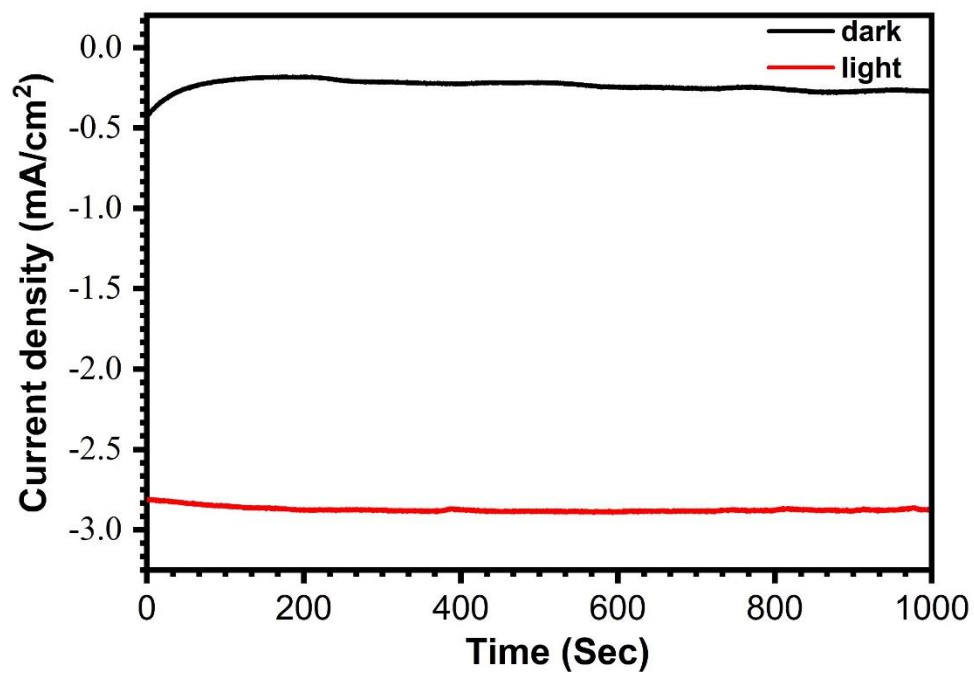

**Figure S11:** (a) X-ray diffraction pattern of CdS NPs. (b) Raman spectrum of CdS NPs. (c) UV-visible absorbance spectra of CdS NPs (d) band gap (Tauc) plot of CdS NPs.

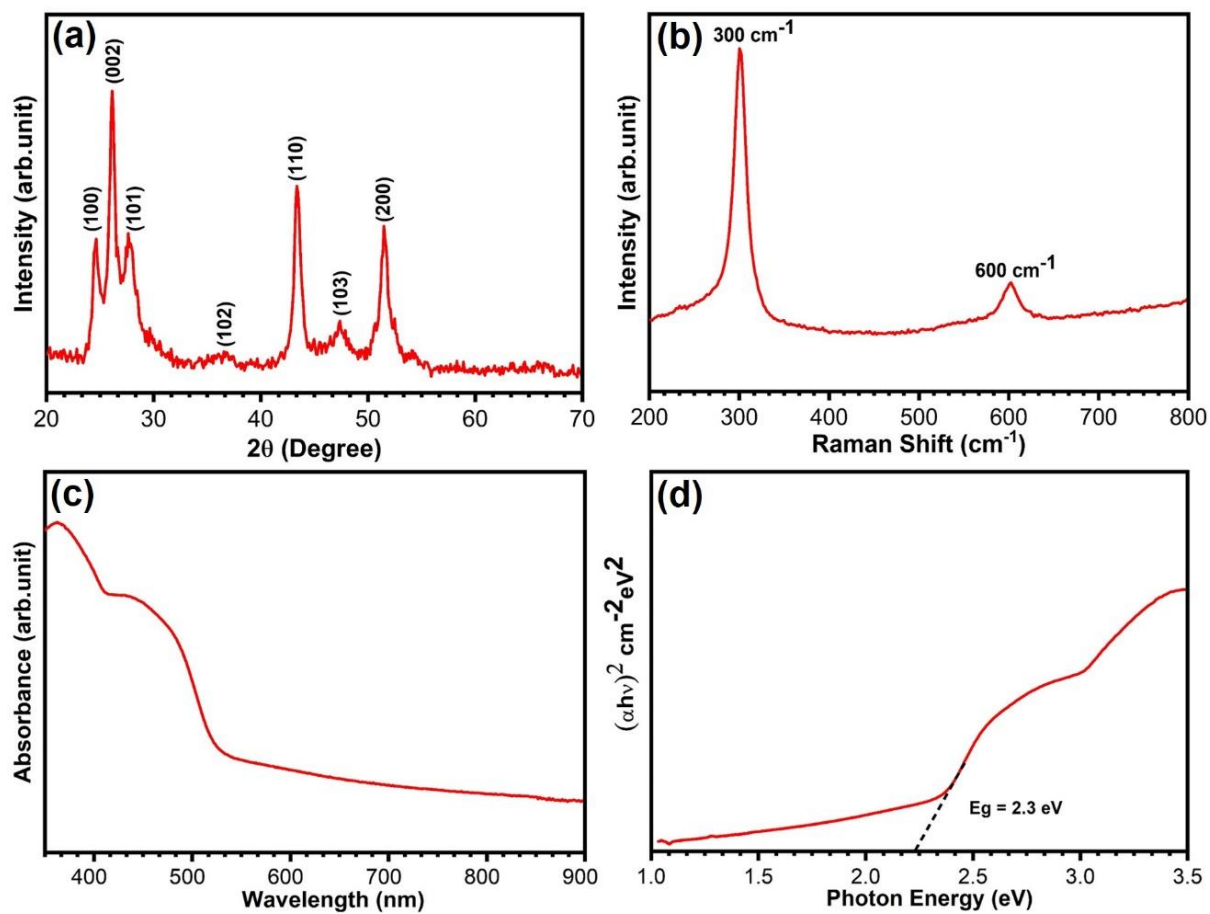

**Figure S12:** (a) XRD pattern of ZnS NPs synthesized by hot injection method. (b) FTIR spectra of ZnS NPs (c) UV-vis absorbance spectra of ZnS NPs. (d) Band gap plot of ZnS NPs

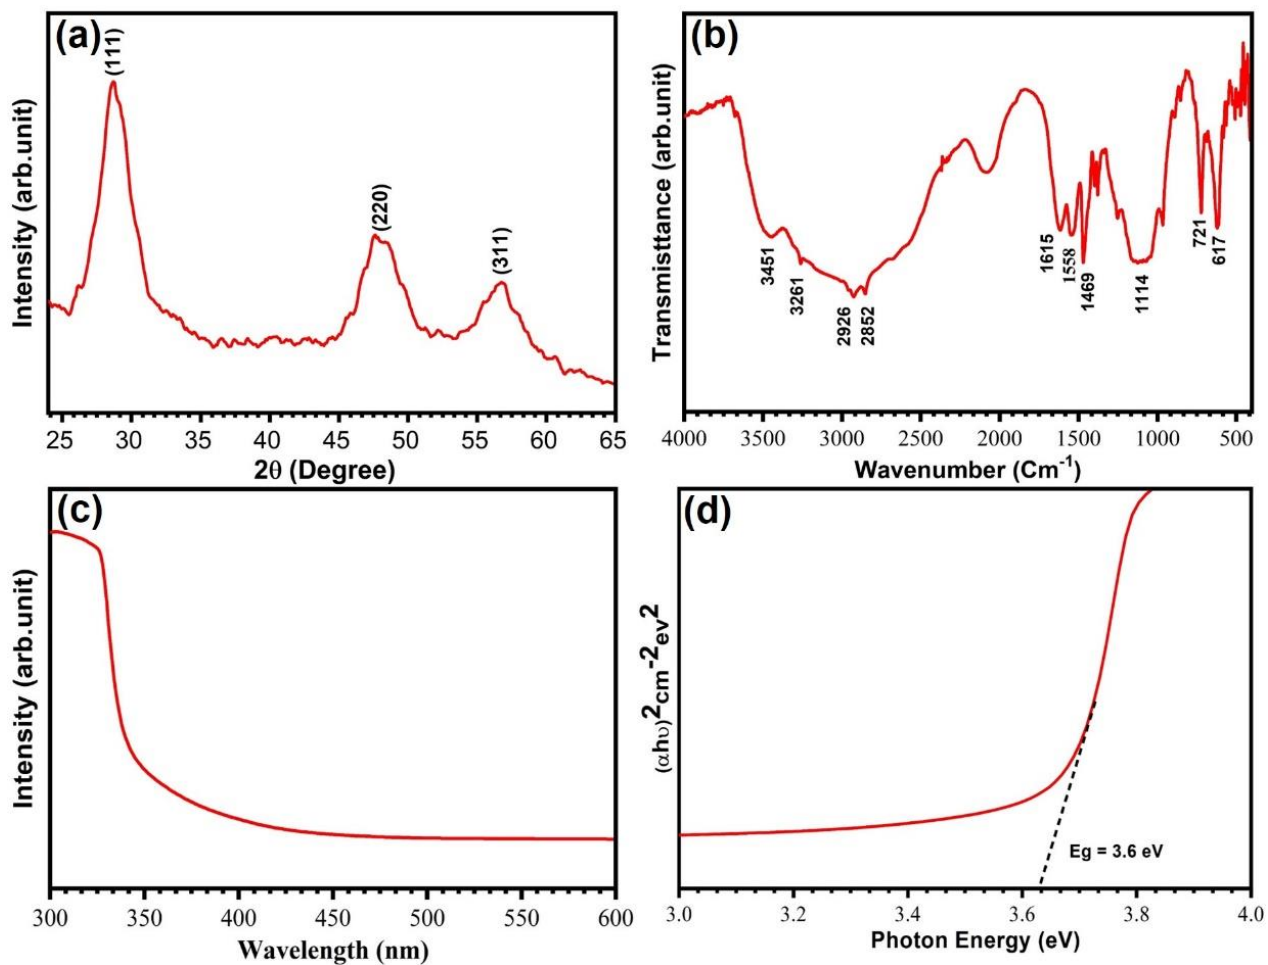

**Figure S13:** (a) Bode phase plot. (b)  $Z'$  real vs.  $-Z''$  imaginary impedance plot (Nyquist plot) of CdS. (c) Mott-Schottky plot. (d) Current Density-Potential curves of CdS under simulated AM 1.5 G light irradiation in different conditions.

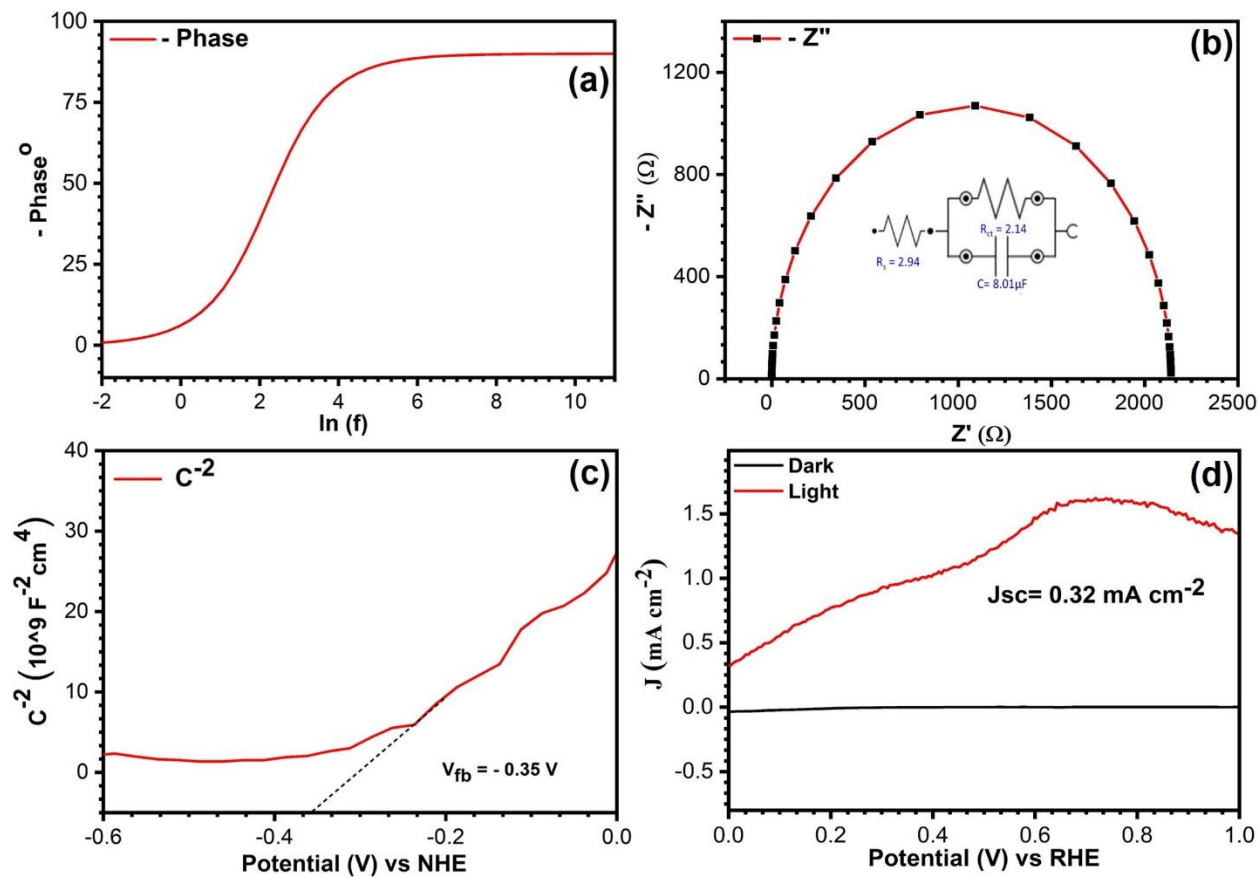

**Figure S14:** (a) Bode Phase plot. (b)  $Z'$  real vs.  $-Z''$  imaginary impedance plot (Nyquist plot) of ZnS. (c) Mott-Schottky plot. (d) Current Density-Potential curves of ZnS under simulated AM 1.5 G light irradiation in different conditions.

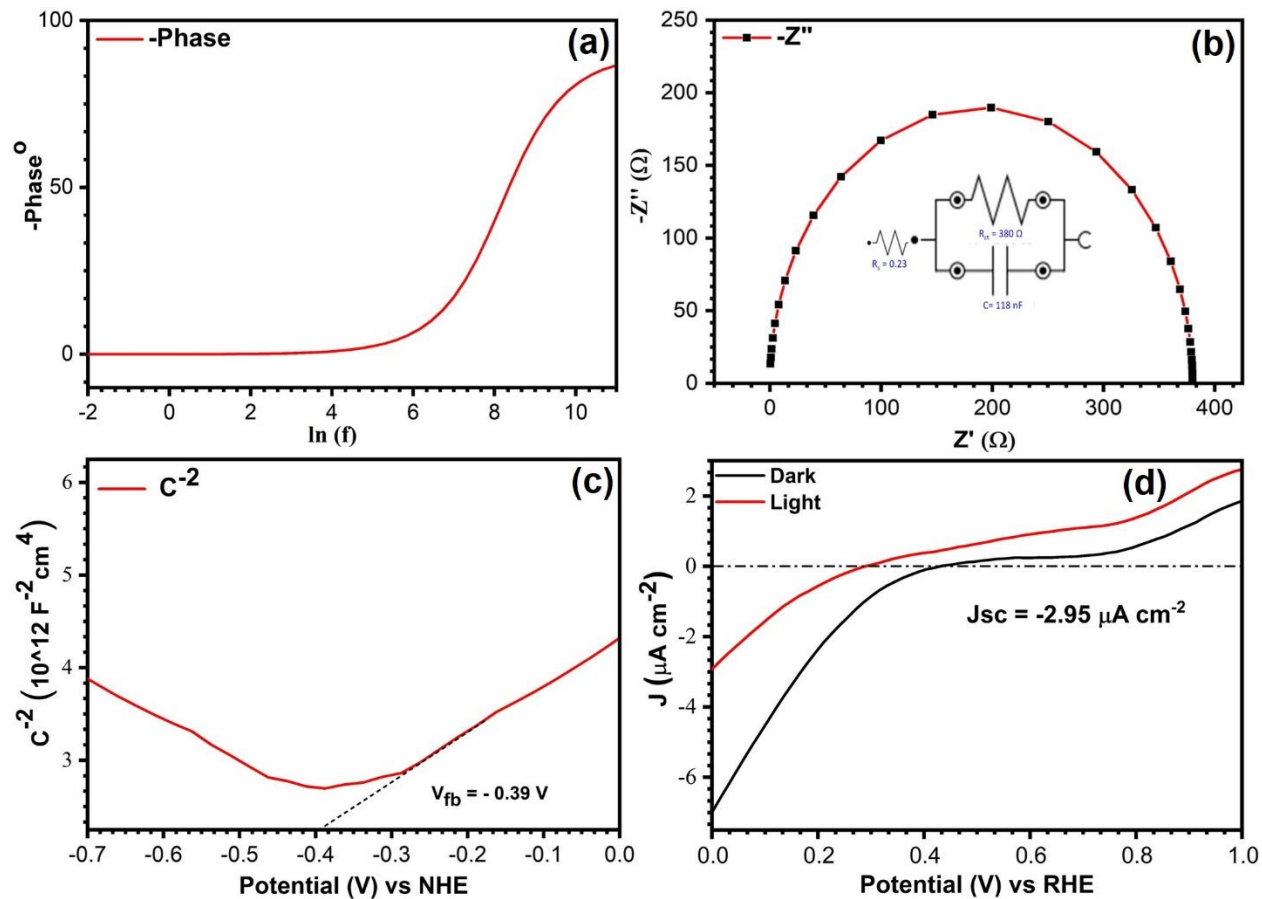

## Bulk CTS: Model-1 Structural parameters (VASP)

Cu Sn S

1.0000000000000000  
16.2923717227231606 0.0000000000000000 0.0000000000000000  
0.0000000000000000 16.2096464468226920 0.0000000000000000  
0.0000000000000000 0.0000000000000000 16.2869151160225449

72 36 108

Cartesian

|               |               |               |
|---------------|---------------|---------------|
| 0.0000000000  | 0.0000000000  | 0.0000000000  |
| 0.0000000000  | 2.7016080000  | 2.6603860000  |
| 2.7153950000  | 2.7016080000  | 0.0000000000  |
| 0.0000000000  | 2.7016080000  | 8.1434570000  |
| 2.7153950000  | 0.0000000000  | 8.1434570000  |
| 2.7153950000  | 2.7016080000  | 5.4830720000  |
| 0.0000000000  | 2.7016080000  | 13.6265290000 |
| 2.7153950000  | 2.7016080000  | 10.8038430000 |
| 0.0000000000  | 5.4032150000  | 0.0000000000  |
| 0.0000000000  | 8.1048230000  | 2.6603860000  |
| 2.7153950000  | 8.1048230000  | 0.0000000000  |
| 0.0000000000  | 8.1048230000  | 8.1434570000  |
| 2.7153950000  | 5.4032150000  | 8.1434570000  |
| 2.7153950000  | 8.1048230000  | 5.4830720000  |
| 0.0000000000  | 8.1048230000  | 13.6265290000 |
| 2.7153950000  | 8.1048230000  | 10.8038430000 |
| 0.0000000000  | 10.8064310000 | 0.0000000000  |
| 0.0000000000  | 13.5080390000 | 2.6603860000  |
| 2.7153950000  | 13.5080390000 | 0.0000000000  |
| 0.0000000000  | 13.5080390000 | 8.1434570000  |
| 2.7153950000  | 10.8064310000 | 8.1434570000  |
| 2.7153950000  | 13.5080390000 | 5.4830720000  |
| 0.0000000000  | 13.5080390000 | 13.6265290000 |
| 2.7153950000  | 13.5080390000 | 10.8038430000 |
| 5.4307910000  | 0.0000000000  | 0.0000000000  |
| 5.4307910000  | 2.7016080000  | 2.6603860000  |
| 8.1461860000  | 2.7016080000  | 0.0000000000  |
| 5.4307910000  | 2.7016080000  | 8.1434570000  |
| 8.1461860000  | 0.0000000000  | 8.1434570000  |
| 8.1461860000  | 2.7016080000  | 5.4830720000  |
| 5.4307910000  | 2.7016080000  | 13.6265290000 |
| 8.1461860000  | 2.7016080000  | 10.8038430000 |
| 5.4307910000  | 5.4032150000  | 0.0000000000  |
| 5.4307910000  | 8.1048230000  | 2.6603860000  |
| 8.1461860000  | 8.1048230000  | 0.0000000000  |
| 5.4307910000  | 8.1048230000  | 8.1434570000  |
| 8.1461860000  | 5.4032150000  | 8.1434570000  |
| 8.1461860000  | 8.1048230000  | 5.4830720000  |
| 5.4307910000  | 8.1048230000  | 13.6265290000 |
| 8.1461860000  | 8.1048230000  | 10.8038430000 |
| 5.4307910000  | 10.8064310000 | 0.0000000000  |
| 5.4307910000  | 13.5080390000 | 2.6603860000  |
| 8.1461860000  | 13.5080390000 | 0.0000000000  |
| 5.4307910000  | 13.5080390000 | 8.1434570000  |
| 8.1461860000  | 10.8064310000 | 8.1434570000  |
| 8.1461860000  | 13.5080390000 | 5.4830720000  |
| 5.4307910000  | 13.5080390000 | 13.6265290000 |
| 8.1461860000  | 13.5080390000 | 10.8038430000 |
| 10.8615820000 | 0.0000000000  | 0.0000000000  |
| 10.8615820000 | 2.7016080000  | 2.6603860000  |
| 13.5769760000 | 2.7016080000  | 0.0000000000  |
| 10.8615820000 | 2.7016080000  | 8.1434570000  |
| 13.5769760000 | 0.0000000000  | 8.1434570000  |

|               |               |               |
|---------------|---------------|---------------|
| 13.5769760000 | 2.7016080000  | 5.4830720000  |
| 10.8615820000 | 2.7016080000  | 13.6265290000 |
| 13.5769760000 | 2.7016080000  | 10.8038430000 |
| 10.8615820000 | 5.4032150000  | 0.0000000000  |
| 10.8615820000 | 8.1048230000  | 2.6603860000  |
| 13.5769760000 | 8.1048230000  | 0.0000000000  |
| 10.8615820000 | 8.1048230000  | 8.1434570000  |
| 13.5769760000 | 5.4032150000  | 8.1434570000  |
| 13.5769760000 | 8.1048230000  | 5.4830720000  |
| 10.8615820000 | 8.1048230000  | 13.6265290000 |
| 13.5769760000 | 8.1048230000  | 10.8038430000 |
| 10.8615820000 | 10.8064310000 | 0.0000000000  |
| 10.8615820000 | 13.5080390000 | 2.6603860000  |
| 13.5769760000 | 13.5080390000 | 0.0000000000  |
| 10.8615820000 | 13.5080390000 | 8.1434570000  |
| 13.5769760000 | 10.8064310000 | 8.1434570000  |
| 13.5769760000 | 13.5080390000 | 5.4830720000  |
| 10.8615820000 | 13.5080390000 | 13.6265290000 |
| 13.5769760000 | 13.5080390000 | 10.8038430000 |
| 2.7153950000  | 0.0000000000  | 2.5617050000  |
| 0.0000000000  | 0.0000000000  | 5.5817520000  |
| 0.0000000000  | 0.0000000000  | 10.7051630000 |
| 2.7153950000  | 0.0000000000  | 13.7252090000 |
| 2.7153950000  | 5.4032150000  | 2.5617050000  |
| 0.0000000000  | 5.4032150000  | 5.5817520000  |
| 0.0000000000  | 5.4032150000  | 10.7051630000 |
| 2.7153950000  | 5.4032150000  | 13.7252090000 |
| 2.7153950000  | 10.8064310000 | 2.5617050000  |
| 0.0000000000  | 10.8064310000 | 5.5817520000  |
| 0.0000000000  | 10.8064310000 | 10.7051630000 |
| 2.7153950000  | 10.8064310000 | 13.7252090000 |
| 8.1461860000  | 0.0000000000  | 2.5617050000  |
| 5.4307910000  | 0.0000000000  | 5.5817520000  |
| 5.4307910000  | 0.0000000000  | 10.7051630000 |
| 8.1461860000  | 0.0000000000  | 13.7252090000 |
| 8.1461860000  | 5.4032150000  | 2.5617050000  |
| 5.4307910000  | 5.4032150000  | 5.5817520000  |
| 5.4307910000  | 5.4032150000  | 10.7051630000 |
| 8.1461860000  | 5.4032150000  | 13.7252090000 |
| 8.1461860000  | 10.8064310000 | 2.5617050000  |
| 5.4307910000  | 10.8064310000 | 5.5817520000  |
| 5.4307910000  | 10.8064310000 | 10.7051630000 |
| 8.1461860000  | 10.8064310000 | 13.7252090000 |
| 13.5769760000 | 0.0000000000  | 2.5617050000  |
| 10.8615820000 | 0.0000000000  | 5.5817520000  |
| 10.8615820000 | 0.0000000000  | 10.7051630000 |
| 13.5769760000 | 0.0000000000  | 13.7252090000 |
| 13.5769760000 | 5.4032150000  | 2.5617050000  |
| 10.8615820000 | 5.4032150000  | 5.5817520000  |
| 10.8615820000 | 5.4032150000  | 10.7051630000 |
| 13.5769760000 | 5.4032150000  | 13.7252090000 |
| 13.5769760000 | 10.8064310000 | 2.5617050000  |
| 10.8615820000 | 10.8064310000 | 5.5817520000  |
| 10.8615820000 | 10.8064310000 | 10.7051630000 |
| 13.5769760000 | 10.8064310000 | 13.7252090000 |
| 4.0730930000  | 1.4940760000  | 4.0717290000  |
| 4.1573790000  | 3.9626280000  | 1.2568030000  |
| 1.2734120000  | 1.4405870000  | 1.2568030000  |
| 1.3576980000  | 3.9091400000  | 4.0717290000  |
| 3.9888070000  | 1.4405870000  | 9.4002610000  |
| 3.9888070000  | 3.9626280000  | 6.8866540000  |
| 1.4419840000  | 1.4405870000  | 6.8866540000  |



|              |               |               |
|--------------|---------------|---------------|
| 1.4419840000 | 3.9626280000  | 9.4002610000  |
| 4.1573790000 | 1.4405870000  | 15.0301110000 |
| 4.0730930000 | 3.9091400000  | 12.2151860000 |
| 1.3576980000 | 1.4940760000  | 12.2151860000 |
| 1.2734120000 | 3.9626280000  | 15.0301110000 |
| 4.0730930000 | 6.8972910000  | 4.0717290000  |
| 4.1573790000 | 9.3658440000  | 1.2568030000  |
| 1.2734120000 | 6.8438030000  | 1.2568030000  |
| 1.3576980000 | 9.3123550000  | 4.0717290000  |
| 3.9888070000 | 6.8438030000  | 9.4002610000  |
| 3.9888070000 | 9.3658440000  | 6.8866540000  |
| 1.4419840000 | 6.8438030000  | 6.8866540000  |
| 1.4419840000 | 9.3658440000  | 9.4002610000  |
| 4.1573790000 | 6.8438030000  | 15.0301110000 |
| 4.0730930000 | 9.3123550000  | 12.2151860000 |
| 1.3576980000 | 6.8972910000  | 12.2151860000 |
| 1.2734120000 | 9.3658440000  | 15.0301110000 |
| 4.0730930000 | 12.3005080000 | 4.0717290000  |
| 4.1573790000 | 14.7690580000 | 1.2568030000  |
| 1.2734120000 | 12.2470180000 | 1.2568030000  |
| 1.3576980000 | 14.7155700000 | 4.0717290000  |
| 3.9888070000 | 12.2470180000 | 9.4002610000  |
| 3.9888070000 | 14.7690580000 | 6.8866540000  |
| 1.4419840000 | 12.2470180000 | 6.8866540000  |
| 1.4419840000 | 14.7690580000 | 9.4002610000  |
| 4.1573790000 | 12.2470180000 | 15.0301110000 |
| 4.0730930000 | 14.7155700000 | 12.2151860000 |
| 1.3576980000 | 12.3005080000 | 12.2151860000 |
| 1.2734120000 | 14.7690580000 | 15.0301110000 |
| 9.5038830000 | 1.4940760000  | 4.0717290000  |
| 9.5881700000 | 3.9626280000  | 1.2568030000  |
| 6.7042020000 | 1.4405870000  | 1.2568030000  |
| 6.7884880000 | 3.9091400000  | 4.0717290000  |
| 9.4195980000 | 1.4405870000  | 9.4002610000  |
| 9.4195980000 | 3.9626280000  | 6.8866540000  |
| 6.8727740000 | 1.4405870000  | 6.8866540000  |
| 6.8727740000 | 3.9626280000  | 9.4002610000  |
| 9.5881700000 | 1.4405870000  | 15.0301110000 |
| 9.5038830000 | 3.9091400000  | 12.2151860000 |
| 6.7884880000 | 1.4940760000  | 12.2151860000 |
| 6.7042020000 | 3.9626280000  | 15.0301110000 |
| 9.5038830000 | 6.8972910000  | 4.0717290000  |
| 9.5881700000 | 9.3658440000  | 1.2568030000  |
| 6.7042020000 | 6.8438030000  | 1.2568030000  |
| 6.7884880000 | 9.3123550000  | 4.0717290000  |
| 9.4195980000 | 6.8438030000  | 9.4002610000  |
| 9.4195980000 | 9.3658440000  | 6.8866540000  |
| 6.8727740000 | 6.8438030000  | 6.8866540000  |
| 6.8727740000 | 9.3658440000  | 9.4002610000  |
| 9.5881700000 | 6.8438030000  | 15.0301110000 |
| 9.5038830000 | 9.3123550000  | 12.2151860000 |
| 6.7884880000 | 6.8972910000  | 12.2151860000 |
| 6.7042020000 | 9.3658440000  | 15.0301110000 |
| 9.5038830000 | 12.3005080000 | 4.0717290000  |
| 9.5881700000 | 14.7690580000 | 1.2568030000  |
| 6.7042020000 | 12.2470180000 | 1.2568030000  |
| 6.7884880000 | 14.7155700000 | 4.0717290000  |
| 9.4195980000 | 12.2470180000 | 9.4002610000  |
| 9.4195980000 | 14.7690580000 | 6.8866540000  |
| 6.8727740000 | 12.2470180000 | 6.8866540000  |
| 6.8727740000 | 14.7690580000 | 9.4002610000  |
| 9.5881700000 | 12.2470180000 | 15.0301110000 |

|               |               |               |
|---------------|---------------|---------------|
| 9.5038830000  | 14.7155700000 | 12.2151860000 |
| 6.7884880000  | 12.3005080000 | 12.2151860000 |
| 6.7042020000  | 14.7690580000 | 15.0301110000 |
| 14.9346740000 | 1.4940760000  | 4.0717290000  |
| 15.0189600000 | 3.9626280000  | 1.2568030000  |
| 12.1349930000 | 1.4405870000  | 1.2568030000  |
| 12.2192780000 | 3.9091400000  | 4.0717290000  |
| 14.8503880000 | 1.4405870000  | 9.4002610000  |
| 14.8503880000 | 3.9626280000  | 6.8866540000  |
| 12.3035650000 | 1.4405870000  | 6.8866540000  |
| 12.3035650000 | 3.9626280000  | 9.4002610000  |
| 15.0189600000 | 1.4405870000  | 15.0301110000 |
| 14.9346740000 | 3.9091400000  | 12.2151860000 |
| 12.2192780000 | 1.4940760000  | 12.2151860000 |
| 12.1349930000 | 3.9626280000  | 15.0301110000 |
| 14.9346740000 | 6.8972910000  | 4.0717290000  |
| 15.0189600000 | 9.3658440000  | 1.2568030000  |
| 12.1349930000 | 6.8438030000  | 1.2568030000  |
| 12.2192780000 | 9.3123550000  | 4.0717290000  |
| 14.8503880000 | 6.8438030000  | 9.4002610000  |
| 14.8503880000 | 9.3658440000  | 6.8866540000  |
| 12.3035650000 | 6.8438030000  | 6.8866540000  |
| 12.3035650000 | 9.3658440000  | 9.4002610000  |
| 15.0189600000 | 6.8438030000  | 15.0301110000 |
| 14.9346740000 | 9.3123550000  | 12.2151860000 |
| 12.2192780000 | 6.8972910000  | 12.2151860000 |
| 12.1349930000 | 9.3658440000  | 15.0301110000 |
| 14.9346740000 | 12.3005080000 | 4.0717290000  |
| 15.0189600000 | 14.7690580000 | 1.2568030000  |
| 12.1349930000 | 12.2470180000 | 1.2568030000  |
| 12.2192780000 | 14.7155700000 | 4.0717290000  |
| 14.8503880000 | 12.2470180000 | 9.4002610000  |
| 14.8503880000 | 14.7690580000 | 6.8866540000  |
| 12.3035650000 | 12.2470180000 | 6.8866540000  |
| 12.3035650000 | 14.7690580000 | 9.4002610000  |
| 15.0189600000 | 12.2470180000 | 15.0301110000 |
| 14.9346740000 | 14.7155700000 | 12.2151860000 |
| 12.2192780000 | 12.3005080000 | 12.2151860000 |
| 12.1349930000 | 14.7690580000 | 15.0301110000 |

## Bulk CTS: Model-2 Structural parameters (VASP)

Cu Sn S

1.0000000000000000  
16.4319356750770709 0.0000000000000000 0.2187760184372871  
0.0000000000000000 16.1000178401744414 0.0000000000000000  
0.2167082976366084 0.0000000000000000 16.3079773495375697  
72 36 108

Cartesian

|               |               |               |
|---------------|---------------|---------------|
| 0.0000000000  | -0.0195080000 | 0.0000000000  |
| 0.0361180000  | 2.5366600000  | 2.7179960000  |
| 2.8353280000  | -0.0163350000 | 2.7022090000  |
| 0.0722360000  | -0.0195080000 | 5.4359930000  |
| 0.1083540000  | 2.5366600000  | 8.1539890000  |
| 2.9075640000  | -0.0163350000 | 8.1382020000  |
| 0.1444720000  | -0.0195080000 | 10.8719850000 |
| 0.1805900000  | 2.5366600000  | 13.5899810000 |
| 2.9798000000  | -0.0163350000 | 13.5741940000 |
| 0.0000000000  | 5.2150020000  | 0.0000000000  |
| 0.0361180000  | 8.0140840000  | 2.7179960000  |
| 2.6072700000  | 5.1748230000  | 2.5910830000  |
| 0.0722360000  | 5.2150020000  | 5.4359930000  |
| 0.1083540000  | 8.0140840000  | 8.1539890000  |
| 2.6795060000  | 5.1748230000  | 8.0270760000  |
| 0.1444720000  | 5.2150020000  | 10.8719850000 |
| 0.1805900000  | 8.0140840000  | 13.5899810000 |
| 2.7517420000  | 5.1748230000  | 13.4630680000 |
| 0.0000000000  | 10.8490490000 | 0.0000000000  |
| 0.0361180000  | 13.5506680000 | 2.7179960000  |
| 2.6421840000  | 10.8914790000 | 2.7415980000  |
| 0.0722360000  | 10.8490490000 | 5.4359930000  |
| 0.1083540000  | 13.5506680000 | 8.1539890000  |
| 2.7144200000  | 10.8914790000 | 8.1775900000  |
| 0.1444720000  | 10.8490490000 | 10.8719850000 |
| 0.1805900000  | 13.5506680000 | 13.5899810000 |
| 2.7866560000  | 10.8914790000 | 13.6135830000 |
| 5.5086430000  | -0.0277960000 | 0.0158870000  |
| 5.4393830000  | 2.5955550000  | 2.6442380000  |
| 8.2520870000  | -0.0310420000 | 2.8273840000  |
| 5.5808790000  | -0.0277960000 | 5.4518800000  |
| 5.5116190000  | 2.5955550000  | 8.0802310000  |
| 8.3243230000  | -0.0310420000 | 8.2633770000  |
| 5.6531150000  | -0.0277960000 | 10.8878720000 |
| 5.5838550000  | 2.5955550000  | 13.5162230000 |
| 8.3965590000  | -0.0310420000 | 13.6993690000 |
| 5.2528200000  | 5.1411340000  | -0.1896810000 |
| 5.3250570000  | 5.1411340000  | 5.2463120000  |
| 5.3972930000  | 5.1411340000  | 10.6823040000 |
| 5.3689350000  | 10.8826540000 | -0.0103500000 |
| 5.5202160000  | 13.4158680000 | 2.7288640000  |
| 8.2520870000  | 10.8792140000 | 2.8273840000  |
| 5.4411710000  | 10.8826540000 | 5.4256420000  |
| 5.5924520000  | 13.4158680000 | 8.1648560000  |
| 8.3243230000  | 10.8792140000 | 8.2633770000  |
| 5.5134070000  | 10.8826540000 | 10.8616350000 |
| 5.6646880000  | 13.4158680000 | 13.6008490000 |
| 8.3965590000  | 10.8792140000 | 13.6993690000 |
| 10.9232940000 | -0.0277960000 | 0.2028890000  |
| 11.0647900000 | 2.5955550000  | 3.0105300000  |
| 13.6688440000 | -0.0163350000 | 2.9525590000  |
| 10.9955300000 | -0.0277960000 | 5.6388820000  |
| 11.1370260000 | 2.5955550000  | 8.4465230000  |

|              |              |              |
|--------------|--------------|--------------|
| 13.741080000 | -0.016335000 | 8.388552000  |
| 11.067766000 | -0.027796000 | 11.074874000 |
| 11.209262000 | 2.595555000  | 13.882515000 |
| 13.813316000 | -0.016335000 | 13.824545000 |
| 11.179116000 | 5.141134000  | 0.408457000  |
| 13.896903000 | 5.174823000  | 3.063685000  |
| 11.251352000 | 5.141134000  | 5.844450000  |
| 13.969139000 | 5.174823000  | 8.499679000  |
| 11.323588000 | 5.141134000  | 11.280441000 |
| 14.041375000 | 5.174823000  | 13.935671000 |
| 11.063002000 | 10.882654000 | 0.229126000  |
| 10.983957000 | 13.415868000 | 2.925905000  |
| 13.861988000 | 10.891479000 | 2.913171000  |
| 11.135238000 | 10.882654000 | 5.665119000  |
| 11.056193000 | 13.415868000 | 8.361897000  |
| 13.934224000 | 10.891479000 | 8.349163000  |
| 11.207475000 | 10.882654000 | 11.101110000 |
| 11.128429000 | 13.415868000 | 13.797890000 |
| 14.006460000 | 10.891479000 | 13.785155000 |
| 5.223773000  | 8.062057000  | 2.511388000  |
| 8.252087000  | 5.727318000  | 2.827384000  |
| 5.296010000  | 8.062057000  | 7.947381000  |
| 8.324323000  | 5.727318000  | 8.263377000  |
| 5.368246000  | 8.062057000  | 13.383373000 |
| 8.396559000  | 5.727318000  | 13.699369000 |
| 11.280398000 | 8.062057000  | 3.143381000  |
| 11.352635000 | 8.062057000  | 8.579373000  |
| 11.424871000 | 8.062057000  | 14.015366000 |
| 2.694931000  | 2.553322000  | -0.037509000 |
| 2.767167000  | 2.553322000  | 5.398484000  |
| 2.839403000  | 2.553322000  | 10.834476000 |
| 2.437442000  | 8.024669000  | -0.094540000 |
| 2.509678000  | 8.024669000  | 5.341453000  |
| 2.581914000  | 8.024669000  | 10.777445000 |
| 2.717501000  | 13.520158000 | 0.000854000  |
| 2.789737000  | 13.520158000 | 5.436847000  |
| 2.861974000  | 13.520158000 | 10.872839000 |
| 8.215968000  | 2.565820000  | 0.109388000  |
| 8.288204000  | 2.565820000  | 5.545381000  |
| 8.360440000  | 2.565820000  | 10.981374000 |
| 8.215968000  | 8.769123000  | 0.109388000  |
| 8.288204000  | 8.769123000  | 5.545381000  |
| 8.360440000  | 8.769123000  | 10.981374000 |
| 8.215968000  | 13.485186000 | 0.109388000  |
| 8.288204000  | 13.485186000 | 5.545381000  |
| 8.360440000  | 13.485186000 | 10.981374000 |
| 13.737006000 | 2.553322000  | 0.256285000  |
| 13.809242000 | 2.553322000  | 5.692277000  |
| 13.881478000 | 2.553322000  | 11.128270000 |
| 13.994495000 | 8.024669000  | 0.313316000  |
| 14.066731000 | 8.024669000  | 5.749309000  |
| 14.138968000 | 8.024669000  | 11.185301000 |
| 13.714435000 | 13.520158000 | 0.217922000  |
| 13.786671000 | 13.520158000 | 5.653914000  |
| 13.858907000 | 13.520158000 | 11.089907000 |
| 4.258662000  | 1.196904000  | 4.022135000  |
| 4.120943000  | 3.976083000  | 1.379627000  |
| 1.330785000  | 1.164921000  | 1.435449000  |
| 1.310585000  | 3.952345000  | 3.996330000  |
| 4.330898000  | 1.196904000  | 9.458128000  |
| 4.193179000  | 3.976083000  | 6.815620000  |
| 1.403021000  | 1.164921000  | 6.871442000  |

|               |               |               |
|---------------|---------------|---------------|
| 1.3828210000  | 3.9523450000  | 9.4323230000  |
| 4.4031340000  | 1.1969040000  | 14.8941200000 |
| 4.2654150000  | 3.9760830000  | 12.2516130000 |
| 1.4752570000  | 1.1649210000  | 12.3074350000 |
| 1.4550570000  | 3.9523450000  | 14.8683170000 |
| 3.9428830000  | 6.4633040000  | 3.9309720000  |
| 3.8572190000  | 9.6421370000  | 1.2114900000  |
| 1.2277220000  | 6.5567170000  | 1.4063410000  |
| 1.2502590000  | 9.5332270000  | 3.9509630000  |
| 4.0151190000  | 6.4633040000  | 9.3669640000  |
| 3.9294550000  | 9.6421370000  | 6.6474830000  |
| 1.2999580000  | 6.5567170000  | 6.8423330000  |
| 1.3224960000  | 9.5332270000  | 9.3869560000  |
| 4.0873550000  | 6.4633040000  | 14.8029570000 |
| 4.0016910000  | 9.6421370000  | 12.0834760000 |
| 1.3721950000  | 6.5567170000  | 12.2783260000 |
| 1.3947320000  | 9.5332270000  | 14.8229480000 |
| 4.1388070000  | 12.0896320000 | 3.9851010000  |
| 4.2318680000  | 14.8107160000 | 1.4353590000  |
| 1.2707630000  | 12.1303950000 | 1.4095370000  |
| 1.3679410000  | 14.8907270000 | 3.9928970000  |
| 4.2110440000  | 12.0896320000 | 9.4210940000  |
| 4.3041040000  | 14.8107160000 | 6.8713520000  |
| 1.3429990000  | 12.1303950000 | 6.8455300000  |
| 1.4401770000  | 14.8907270000 | 9.4288880000  |
| 4.2832800000  | 12.0896320000 | 14.8570860000 |
| 4.3763400000  | 14.8107160000 | 12.3073440000 |
| 1.4152360000  | 12.1303950000 | 12.2815220000 |
| 1.5124140000  | 14.8907270000 | 14.8648820000 |
| 9.7029320000  | 1.1693250000  | 4.1589020000  |
| 9.7195820000  | 3.9082810000  | 1.6215990000  |
| 6.8012390000  | 1.1693250000  | 1.4958670000  |
| 6.7845910000  | 3.9082810000  | 4.0331700000  |
| 9.7751680000  | 1.1693250000  | 9.5948930000  |
| 9.7918180000  | 3.9082810000  | 7.0575920000  |
| 6.8734750000  | 1.1693250000  | 6.9318590000  |
| 6.8568270000  | 3.9082810000  | 9.4691630000  |
| 9.8474040000  | 1.1693250000  | 15.0308870000 |
| 9.8640540000  | 3.9082810000  | 12.4935840000 |
| 6.9457110000  | 1.1693250000  | 12.3678520000 |
| 6.9290630000  | 3.9082810000  | 14.9051550000 |
| 10.0298190000 | 6.7727580000  | 4.8043910000  |
| 9.9855120000  | 9.6494370000  | 1.8942690000  |
| 6.4743530000  | 6.7727580000  | 0.8503780000  |
| 6.5186610000  | 9.6494370000  | 3.7604990000  |
| 10.1020560000 | 6.7727580000  | 10.2403840000 |
| 10.0577480000 | 9.6494370000  | 7.3302620000  |
| 6.5465890000  | 6.7727580000  | 6.2863710000  |
| 6.5908980000  | 9.6494370000  | 9.1964910000  |
| 10.1742920000 | 6.7727580000  | 15.6763760000 |
| 10.1299840000 | 9.6494370000  | 12.7662540000 |
| 6.6188250000  | 6.7727580000  | 11.7223630000 |
| 6.6631340000  | 9.6494370000  | 14.6324830000 |
| 9.7107930000  | 11.9830710000 | 4.2352510000  |
| 9.6745920000  | 14.7719360000 | 1.6059280000  |
| 6.7933800000  | 11.9830710000 | 1.4195170000  |
| 6.8295800000  | 14.7719360000 | 4.0488410000  |
| 9.7830290000  | 11.9830710000 | 9.6712440000  |
| 9.7468280000  | 14.7719360000 | 7.0419210000  |
| 6.8656160000  | 11.9830710000 | 6.8555100000  |
| 6.9018160000  | 14.7719360000 | 9.4848330000  |
| 9.8552650000  | 11.9830710000 | 15.1072360000 |

|               |               |               |
|---------------|---------------|---------------|
| 9.8190640000  | 14.7719360000 | 12.4779130000 |
| 6.9378520000  | 11.9830710000 | 12.2915020000 |
| 6.9740520000  | 14.7719360000 | 14.9208250000 |
| 15.1733880000 | 1.1649210000  | 4.2193190000  |
| 15.1935880000 | 3.9523450000  | 1.6584380000  |
| 12.2455100000 | 1.1969040000  | 1.6326340000  |
| 12.3832300000 | 3.9760830000  | 4.2751420000  |
| 15.2456240000 | 1.1649210000  | 9.6553110000  |
| 15.2658240000 | 3.9523450000  | 7.0944310000  |
| 12.3177460000 | 1.1969040000  | 7.0686260000  |
| 12.4554660000 | 3.9760830000  | 9.7111340000  |
| 15.3178600000 | 1.1649210000  | 15.0913040000 |
| 15.3380600000 | 3.9523450000  | 12.5304230000 |
| 12.3899820000 | 1.1969040000  | 12.5046200000 |
| 12.5277020000 | 3.9760830000  | 15.1471260000 |
| 15.2764490000 | 6.5567170000  | 4.2484270000  |
| 15.2539130000 | 9.5332270000  | 1.7038050000  |
| 12.5612900000 | 6.4633040000  | 1.7237970000  |
| 12.6469530000 | 9.6421370000  | 4.4432780000  |
| 15.3486850000 | 6.5567170000  | 9.6844200000  |
| 15.3261490000 | 9.5332270000  | 7.1397980000  |
| 12.6335260000 | 6.4633040000  | 7.1597900000  |
| 12.7191890000 | 9.6421370000  | 9.8792710000  |
| 15.4209220000 | 6.5567170000  | 15.1204130000 |
| 15.3983850000 | 9.5332270000  | 12.5757900000 |
| 12.7057620000 | 6.4633040000  | 12.5957820000 |
| 12.7914250000 | 9.6421370000  | 15.3152640000 |
| 15.2334090000 | 12.1303950000 | 4.2452310000  |
| 15.1362300000 | 14.8907270000 | 1.6618720000  |
| 12.3653650000 | 12.0896320000 | 1.6696670000  |
| 12.2723040000 | 14.8107160000 | 4.2194090000  |
| 15.3056450000 | 12.1303950000 | 9.6812240000  |
| 15.2084670000 | 14.8907270000 | 7.0978640000  |
| 12.4376010000 | 12.0896320000 | 7.1056600000  |
| 12.3445400000 | 14.8107160000 | 9.6554010000  |
| 15.3778810000 | 12.1303950000 | 15.1172160000 |
| 15.2807030000 | 14.8907270000 | 12.5338570000 |
| 12.5098370000 | 12.0896320000 | 12.5416530000 |
| 12.4167770000 | 14.8107160000 | 15.0913940000 |

## Bulk CTS: Model-3 Structural parameters (VASP)

Cu Sn S

```
1.0000000000000000
16.4148186127710858 -0.0000000000000000 -0.0000000000000000
0.0000000000000000 16.4148186127710858 -0.0000000000000000
0.0000000000000000 -0.0000000000000000 16.3814274087187606
```

72 36 108

Cartesian

```
0.0000000000 0.0000000000 0.0000000000
0.0000000000 2.7358030000 2.3552690000
2.7358030000 0.0000000000 2.3552690000
0.0000000000 2.7358030000 8.1907140000
2.7358030000 0.0000000000 8.1907140000
0.0000000000 2.7358030000 14.0261590000
2.7358030000 0.0000000000 14.0261590000
0.0000000000 5.4716060000 0.0000000000
0.0000000000 8.2074090000 2.3552690000
2.7358030000 5.4716060000 2.3552690000
0.0000000000 8.2074090000 8.1907140000
2.7358030000 5.4716060000 8.1907140000
0.0000000000 8.2074090000 14.0261590000
2.7358030000 5.4716060000 14.0261590000
0.0000000000 10.9432130000 0.0000000000
0.0000000000 13.6790140000 2.3552690000
2.7358030000 10.9432130000 2.3552690000
0.0000000000 13.6790140000 8.1907140000
2.7358030000 10.9432130000 8.1907140000
0.0000000000 13.6790140000 14.0261590000
2.7358030000 10.9432130000 14.0261590000
5.4716060000 0.0000000000 0.0000000000
5.4716060000 2.7358030000 2.3552690000
8.2074090000 0.0000000000 2.3552690000
5.4716060000 2.7358030000 8.1907140000
8.2074090000 0.0000000000 8.1907140000
5.4716060000 2.7358030000 14.0261590000
8.2074090000 0.0000000000 14.0261590000
5.4716060000 5.4716060000 0.0000000000
5.4716060000 10.9432130000 0.0000000000
5.4716060000 13.6790140000 2.3552690000
8.2074090000 10.9432130000 2.3552690000
5.4716060000 13.6790140000 8.1907140000
8.2074090000 10.9432130000 8.1907140000
5.4716060000 13.6790140000 14.0261590000
8.2074090000 10.9432130000 14.0261590000
10.9432130000 0.0000000000 0.0000000000
10.9432130000 2.7358030000 2.3552690000
13.6790140000 0.0000000000 2.3552690000
10.9432130000 2.7358030000 8.1907140000
13.6790140000 0.0000000000 8.1907140000
10.9432130000 2.7358030000 14.0261590000
13.6790140000 0.0000000000 14.0261590000
10.9432130000 5.4716060000 0.0000000000
13.6790140000 5.4716060000 2.3552690000
13.6790140000 5.4716060000 8.1907140000
13.6790140000 5.4716060000 14.0261590000
10.9432130000 10.9432130000 0.0000000000
10.9432130000 13.6790140000 2.3552690000
13.6790140000 10.9432130000 2.3552690000
10.9432130000 13.6790140000 8.1907140000
13.6790140000 10.9432130000 8.1907140000
10.9432130000 13.6790140000 14.0261590000
```

|               |               |               |
|---------------|---------------|---------------|
| 13.6790140000 | 10.9432130000 | 14.0261590000 |
| 5.4716060000  | 8.2074090000  | 2.3552690000  |
| 8.2074090000  | 5.4716060000  | 2.3552690000  |
| 5.4716060000  | 8.2074090000  | 8.1907140000  |
| 8.2074090000  | 5.4716060000  | 8.1907140000  |
| 5.4716060000  | 8.2074090000  | 14.0261590000 |
| 8.2074090000  | 5.4716060000  | 14.0261590000 |
| 10.9432130000 | 8.2074090000  | 2.3552690000  |
| 10.9432130000 | 8.2074090000  | 8.1907140000  |
| 10.9432130000 | 8.2074090000  | 14.0261590000 |
| 2.7358030000  | 2.7358030000  | 0.0000000000  |
| 2.7358030000  | 8.2074090000  | 0.0000000000  |
| 2.7358030000  | 13.6790140000 | 0.0000000000  |
| 8.2074090000  | 2.7358030000  | 0.0000000000  |
| 8.2074090000  | 8.2074090000  | 0.0000000000  |
| 8.2074090000  | 13.6790140000 | 0.0000000000  |
| 13.6790140000 | 2.7358030000  | 0.0000000000  |
| 13.6790140000 | 8.2074090000  | 0.0000000000  |
| 13.6790140000 | 13.6790140000 | 0.0000000000  |
| 0.0000000000  | 0.0000000000  | 5.2671290000  |
| 0.0000000000  | 5.4716060000  | 5.2671290000  |
| 0.0000000000  | 10.9432130000 | 5.2671290000  |
| 5.4716060000  | 0.0000000000  | 5.2671290000  |
| 5.4716060000  | 5.4716060000  | 5.2671290000  |
| 5.4716060000  | 10.9432130000 | 5.2671290000  |
| 10.9432130000 | 0.0000000000  | 5.2671290000  |
| 10.9432130000 | 5.4716060000  | 5.2671290000  |
| 10.9432130000 | 10.9432130000 | 5.2671290000  |
| 2.7358030000  | 2.7358030000  | 5.2671290000  |
| 2.7358030000  | 8.2074090000  | 5.2671290000  |
| 2.7358030000  | 13.6790140000 | 5.2671290000  |
| 8.2074090000  | 2.7358030000  | 5.2671290000  |
| 8.2074090000  | 8.2074090000  | 5.2671290000  |
| 8.2074090000  | 13.6790140000 | 5.2671290000  |
| 13.6790140000 | 2.7358030000  | 5.2671290000  |
| 13.6790140000 | 8.2074090000  | 5.2671290000  |
| 13.6790140000 | 13.6790140000 | 5.2671290000  |
| 0.0000000000  | 0.0000000000  | 11.1142990000 |
| 0.0000000000  | 5.4716060000  | 11.1142990000 |
| 0.0000000000  | 10.9432130000 | 11.1142990000 |
| 5.4716060000  | 0.0000000000  | 11.1142990000 |
| 5.4716060000  | 5.4716060000  | 11.1142990000 |
| 5.4716060000  | 10.9432130000 | 11.1142990000 |
| 10.9432130000 | 0.0000000000  | 11.1142990000 |
| 10.9432130000 | 5.4716060000  | 11.1142990000 |
| 10.9432130000 | 10.9432130000 | 11.1142990000 |
| 2.7358030000  | 2.7358030000  | 11.1142990000 |
| 2.7358030000  | 8.2074090000  | 11.1142990000 |
| 2.7358030000  | 13.6790140000 | 11.1142990000 |
| 8.2074090000  | 2.7358030000  | 11.1142990000 |
| 8.2074090000  | 8.2074090000  | 11.1142990000 |
| 8.2074090000  | 13.6790140000 | 11.1142990000 |
| 13.6790140000 | 2.7358030000  | 11.1142990000 |
| 13.6790140000 | 8.2074090000  | 11.1142990000 |
| 13.6790140000 | 13.6790140000 | 11.1142990000 |
| 4.1037040000  | 1.3679020000  | 3.6009640000  |
| 4.1037040000  | 4.1037040000  | 1.2063430000  |
| 1.3679020000  | 1.3679020000  | 1.2063430000  |
| 1.3679020000  | 4.1037040000  | 3.6009640000  |
| 4.1037040000  | 1.3679020000  | 9.3997130000  |
| 4.1037040000  | 4.1037040000  | 6.9817160000  |
| 1.3679020000  | 1.3679020000  | 6.9817160000  |



|              |               |               |
|--------------|---------------|---------------|
| 1.3679020000 | 4.1037040000  | 9.3997130000  |
| 4.1037040000 | 1.3679020000  | 15.1750850000 |
| 4.1037040000 | 4.1037040000  | 12.7804640000 |
| 1.3679020000 | 1.3679020000  | 12.7804640000 |
| 1.3679020000 | 4.1037040000  | 15.1750850000 |
| 4.1037040000 | 6.8395070000  | 3.6009640000  |
| 4.1037040000 | 9.5753100000  | 1.2063430000  |
| 1.3679020000 | 6.8395070000  | 1.2063430000  |
| 1.3679020000 | 9.5753100000  | 3.6009640000  |
| 4.1037040000 | 6.8395070000  | 9.3997130000  |
| 4.1037040000 | 9.5753100000  | 6.9817160000  |
| 1.3679020000 | 6.8395070000  | 6.9817160000  |
| 1.3679020000 | 9.5753100000  | 9.3997130000  |
| 4.1037040000 | 6.8395070000  | 15.1750850000 |
| 4.1037040000 | 9.5753100000  | 12.7804640000 |
| 1.3679020000 | 6.8395070000  | 12.7804640000 |
| 1.3679020000 | 9.5753100000  | 15.1750850000 |
| 4.1037040000 | 12.3111130000 | 3.6009640000  |
| 4.1037040000 | 15.0469170000 | 1.2063430000  |
| 1.3679020000 | 12.3111130000 | 1.2063430000  |
| 1.3679020000 | 15.0469170000 | 3.6009640000  |
| 4.1037040000 | 12.3111130000 | 9.3997130000  |
| 4.1037040000 | 15.0469170000 | 6.9817160000  |
| 1.3679020000 | 12.3111130000 | 6.9817160000  |
| 1.3679020000 | 15.0469170000 | 9.3997130000  |
| 4.1037040000 | 12.3111130000 | 15.1750850000 |
| 4.1037040000 | 15.0469170000 | 12.7804640000 |
| 1.3679020000 | 12.3111130000 | 12.7804640000 |
| 1.3679020000 | 15.0469170000 | 15.1750850000 |
| 9.5753100000 | 1.3679020000  | 3.6009640000  |
| 9.5753100000 | 4.1037040000  | 1.2063430000  |
| 6.8395070000 | 1.3679020000  | 1.2063430000  |
| 6.8395070000 | 4.1037040000  | 3.6009640000  |
| 9.5753100000 | 1.3679020000  | 9.3997130000  |
| 9.5753100000 | 4.1037040000  | 6.9817160000  |
| 6.8395070000 | 1.3679020000  | 6.9817160000  |
| 6.8395070000 | 4.1037040000  | 9.3997130000  |
| 9.5753100000 | 1.3679020000  | 15.1750850000 |
| 9.5753100000 | 4.1037040000  | 12.7804640000 |
| 6.8395070000 | 1.3679020000  | 12.7804640000 |
| 6.8395070000 | 4.1037040000  | 15.1750850000 |
| 9.5753100000 | 6.8395070000  | 3.6009640000  |
| 9.5753100000 | 9.5753100000  | 1.2063430000  |
| 6.8395070000 | 6.8395070000  | 1.2063430000  |
| 6.8395070000 | 9.5753100000  | 3.6009640000  |
| 9.5753100000 | 6.8395070000  | 9.3997130000  |
| 9.5753100000 | 9.5753100000  | 6.9817160000  |
| 6.8395070000 | 6.8395070000  | 6.9817160000  |
| 6.8395070000 | 9.5753100000  | 9.3997130000  |
| 9.5753100000 | 6.8395070000  | 15.1750850000 |
| 9.5753100000 | 9.5753100000  | 12.7804640000 |
| 6.8395070000 | 6.8395070000  | 12.7804640000 |
| 6.8395070000 | 9.5753100000  | 15.1750850000 |
| 9.5753100000 | 12.3111130000 | 3.6009640000  |
| 9.5753100000 | 15.0469170000 | 1.2063430000  |
| 6.8395070000 | 12.3111130000 | 1.2063430000  |
| 6.8395070000 | 15.0469170000 | 3.6009640000  |
| 9.5753100000 | 12.3111130000 | 9.3997130000  |
| 9.5753100000 | 15.0469170000 | 6.9817160000  |
| 6.8395070000 | 12.3111130000 | 6.9817160000  |
| 6.8395070000 | 15.0469170000 | 9.3997130000  |
| 9.5753100000 | 12.3111130000 | 15.1750850000 |

|              |              |              |
|--------------|--------------|--------------|
| 9.575310000  | 15.046917000 | 12.780464000 |
| 6.839507000  | 12.311113000 | 12.780464000 |
| 6.839507000  | 15.046917000 | 15.175085000 |
| 15.046917000 | 1.367902000  | 3.600964000  |
| 15.046917000 | 4.103704000  | 1.206343000  |
| 12.311113000 | 1.367902000  | 1.206343000  |
| 12.311113000 | 4.103704000  | 3.600964000  |
| 15.046917000 | 1.367902000  | 9.399713000  |
| 15.046917000 | 4.103704000  | 6.981716000  |
| 12.311113000 | 1.367902000  | 6.981716000  |
| 12.311113000 | 4.103704000  | 9.399713000  |
| 15.046917000 | 1.367902000  | 15.175085000 |
| 15.046917000 | 4.103704000  | 12.780464000 |
| 12.311113000 | 1.367902000  | 12.780464000 |
| 12.311113000 | 4.103704000  | 15.175085000 |
| 15.046917000 | 6.839507000  | 3.600964000  |
| 15.046917000 | 9.575310000  | 1.206343000  |
| 12.311113000 | 6.839507000  | 1.206343000  |
| 12.311113000 | 9.575310000  | 3.600964000  |
| 15.046917000 | 6.839507000  | 9.399713000  |
| 15.046917000 | 9.575310000  | 6.981716000  |
| 12.311113000 | 6.839507000  | 6.981716000  |
| 12.311113000 | 9.575310000  | 9.399713000  |
| 15.046917000 | 6.839507000  | 15.175085000 |
| 15.046917000 | 9.575310000  | 12.780464000 |
| 12.311113000 | 6.839507000  | 12.780464000 |
| 12.311113000 | 9.575310000  | 15.175085000 |
| 15.046917000 | 12.311113000 | 3.600964000  |
| 15.046917000 | 15.046917000 | 1.206343000  |
| 12.311113000 | 12.311113000 | 1.206343000  |
| 12.311113000 | 15.046917000 | 3.600964000  |
| 15.046917000 | 12.311113000 | 9.399713000  |
| 15.046917000 | 15.046917000 | 6.981716000  |
| 12.311113000 | 12.311113000 | 6.981716000  |
| 12.311113000 | 15.046917000 | 9.399713000  |
| 15.046917000 | 12.311113000 | 15.175085000 |
| 15.046917000 | 15.046917000 | 12.780464000 |
| 12.311113000 | 12.311113000 | 12.780464000 |
| 12.311113000 | 15.046917000 | 15.175085000 |

### **Bulk CdS: Structural parameters (VASP)**

Cd S

```
1.0000000000000000
 4.1560896338577944  0.000000069236663 -0.0000000000000000
-2.0780453049367553  3.5992790341404586  0.0000000000000000
 0.0000000000000000  0.0000000000000000  6.7600040349108603
 2 2
```

Cartesian

```
-0.0000030000  2.3995200000  0.0012320000
2.0780470000  1.1997580000  3.3812340000
-0.0000030000  2.3995200000  2.5472890000
2.0780470000  1.1997580000  5.9272910000
```

### **Bulk ZnS: Structural parameters (VASP)**

Zn S

```
1.0000000000000000
 5.4074360910337922 -0.0000000000000000 -0.0000000000000000
 0.0000000000000000  5.4074360910337922  0.0000000000000000
-0.0000000000000000  0.0000000000000000  5.4074360910337922
 4 4
```

Cartesian

```
0.0000000000  0.0000000000  0.0000000000
0.0000000000  2.6937180000  2.6937180000
2.6937180000  0.0000000000  2.6937180000
2.6937180000  2.6937180000  0.0000000000
4.0405770000  1.3468590000  4.0405770000
4.0405770000  4.0405770000  1.3468590000
1.3468590000  1.3468590000  1.3468590000
1.3468590000  4.0405770000  4.0405770000
```

## CTS (111) surface: Structural parameters (VASP)

Cu Sn S

1.0

|               |                |               |
|---------------|----------------|---------------|
| 22.8522052765 | 0.0000000000   | 0.0000000000  |
| 11.3051514310 | 19.8729397395  | 0.0000000000  |
| 0.0000000000  | -25.8086517789 | 38.9657881411 |

44 71 216

Cartesian

|              |              |             |
|--------------|--------------|-------------|
| 7.430366805  | 4.969325343  | 0.718451211 |
| 11.273397631 | 4.999465712  | 0.834997891 |
| 9.292078087  | 8.274316421  | 0.961091161 |
| 15.073543667 | 5.111150950  | 1.050127985 |
| 16.957732833 | 8.421411121  | 1.051530727 |
| 13.057825808 | 14.904984095 | 1.108498762 |
| 11.159062417 | 11.623809908 | 1.112629113 |
| 15.007279368 | 18.037810520 | 1.117655674 |
| 13.189352459 | 1.702401230  | 1.121123665 |
| 22.731990957 | 11.623459911 | 1.124318830 |
| 7.415823120  | 11.631846981 | 1.126267152 |
| 18.841931031 | 11.630369819 | 1.127358166 |
| 14.951845703 | 11.631237666 | 1.134839582 |
| 26.524794610 | 11.642455464 | 1.138034819 |
| 18.882624491 | 18.050838690 | 1.152023562 |
| 28.394387077 | 14.949333380 | 1.168817790 |
| 22.610285953 | 18.138287868 | 1.212888096 |
| 20.726104833 | 14.818023290 | 1.218849844 |
| 24.623383759 | 8.463777823  | 1.218927794 |
| 18.873661207 | 5.283077273  | 1.220992969 |
| 11.184197520 | 18.126987688 | 1.221187773 |
| 22.716706093 | 5.385340185  | 1.284546137 |
| 26.337985082 | 18.170258435 | 1.314549895 |
| 30.213325902 | 18.199177593 | 1.337227920 |
| 11.198747123 | 7.292178820  | 3.879433867 |
| 15.041777272 | 7.322318645  | 3.995980475 |
| 13.060458069 | 10.597195025 | 4.122034988 |
| 18.841922964 | 7.434004475  | 4.211110569 |
| 20.726124947 | 10.744310502 | 4.212474482 |
| 5.521054548  | -2.645076563 | 4.269442371 |
| 14.927442398 | 13.946662696 | 4.273611915 |
| 7.470531074  | 0.487723569  | 4.278638476 |
| 16.957732865 | 4.025280030  | 4.282067419 |
| 26.500371280 | 13.946338515 | 4.285262656 |
| 11.184215578 | 13.954719955 | 4.287249881 |
| 22.610311353 | 13.953222656 | 4.288340895 |
| 18.720236800 | 13.954110592 | 4.295822384 |
| 30.293174932 | 13.965334212 | 4.298978428 |
| 11.345853213 | 0.500751491  | 4.313006291 |
| 20.857616126 | -2.600727334 | 4.329761399 |
| 15.073526468 | 0.588221398  | 4.373870826 |
| 13.189333577 | -2.732063824 | 4.379832500 |
| 28.391775536 | 10.786676708 | 4.379871403 |
| 22.642052647 | 7.605975469  | 4.381936723 |
| 3.647436503  | 0.576921267  | 4.382170429 |
| 26.485086415 | 7.708193070  | 4.445528793 |
| 18.801214142 | 0.620197644  | 4.475493649 |

|              |              |              |
|--------------|--------------|--------------|
| 22.676554625 | 0.649090346  | 4.498210722  |
| 14.967138223 | 9.615076920  | 7.040377767  |
| 18.810157594 | 9.645197393  | 7.156924083  |
| 16.828838724 | 12.920048998 | 7.283017790  |
| 22.610303286 | 9.756883223  | 7.372054178  |
| 24.494505269 | 13.067163483 | 7.373456993  |
| 9.289445964  | -0.322203483 | 7.430424883  |
| 7.390682320  | -3.603378307 | 7.434555524  |
| 11.238910715 | 2.810602317  | 7.439582085  |
| 20.726111825 | 6.348132819  | 7.443050221  |
| 18.963611626 | -3.603728299 | 7.446245458  |
| 3.647444466  | -3.595340444 | 7.448193490  |
| 15.073540413 | -3.596838040 | 7.449284504  |
| 11.183465522 | -3.595976463 | 7.456804895  |
| 22.756404160 | -3.584752146 | 7.459961230  |
| 15.114233023 | 2.823630535  | 7.473949900  |
| 24.626007914 | -0.277854390 | 7.490744201  |
| 18.841930114 | 2.911100442  | 7.534814434  |
| 16.957714046 | -0.409185009 | 7.540776400  |
| 32.160155858 | 13.109529497 | 7.540854205  |
| 26.410432281 | 9.928829443  | 7.542919525  |
| 7.415816823  | 2.899800311  | 7.543114038  |
| 30.253465375 | 10.031071818 | 7.606472402  |
| 22.569594632 | 2.943050921  | 7.636476161  |
| 26.444935116 | 2.971969583  | 7.659154041  |
| 18.735518546 | 11.937929902 | 10.201360278 |
| 22.578549372 | 11.968070511 | 10.317906595 |
| 9.292078734  | -4.629992449 | 10.443961399 |
| 26.378695063 | 12.079756341 | 10.533036689 |
| 16.957734160 | -4.482897893 | 10.534401183 |
| 13.057826455 | 2.000675561  | 10.591368492 |
| 11.159062726 | -1.280525562 | 10.595538616 |
| 15.007302493 | 5.133475435  | 10.600564597 |
| 24.494503603 | 8.671031703  | 10.603993830 |
| 22.731991948 | -1.280849166 | 10.607188486 |
| 7.415824447  | -1.272487848 | 10.609176582 |
| 18.841932022 | -1.273965218 | 10.610267016 |
| 14.951845332 | -1.273097804 | 10.617749085 |
| 3.672589299  | -1.261853646 | 10.620905419 |
| 18.882624800 | 5.146503653  | 10.634932411 |
| 5.542183128  | 2.044998887  | 10.651726712 |
| 22.610287618 | 5.233954015  | 10.695796946 |
| 20.726105824 | 1.913688109  | 10.701758911 |
| 1.771179473  | -4.440531880 | 10.701798394 |
| 30.178812604 | 12.251708190 | 10.703863134 |
| 11.184197142 | 5.222653884  | 10.704096550 |
| 11.169651876 | 12.353944551 | 10.767455494 |
| 26.337986073 | 5.265949213  | 10.797419769 |
| 7.361121617  | 5.294842701  | 10.820136552 |
| 11.198747093 | -5.612130498 | 13.362303887 |
| 15.041777069 | -5.581990185 | 13.478850204 |
| 13.060458375 | -2.307139083 | 13.604943329 |
| 18.841923954 | -5.470304651 | 13.693980298 |
| 20.726113121 | -2.160044528 | 13.695383113 |
| 16.826206433 | 4.323528750  | 13.752351584 |
| 14.927442367 | 1.042353186  | 13.756482225 |

|              |               |              |
|--------------|---------------|--------------|
| 18.775682815 | 7.456354183   | 13.761508206 |
| 16.957732673 | -8.879055125  | 13.764976922 |
| 26.500370908 | 1.042003430   | 13.768171578 |
| 11.184204766 | 1.050391492   | 13.770120191 |
| 22.610312344 | 1.048887378   | 13.771250108 |
| 18.720225654 | 1.049755562   | 13.778731015 |
| 7.440970469  | 1.061000312   | 13.781887350 |
| 22.651005123 | 7.469382401   | 13.795876020 |
| 9.310562432  | 4.367877042   | 13.812670321 |
| 26.378700515 | 7.556851716   | 13.856740555 |
| 24.494484784 | 4.236540705   | 13.862742003 |
| 5.539559285  | -2.117678514  | 13.862780325 |
| 22.642052613 | -5.298359408  | 13.864846226 |
| 14.952577124 | 7.545506480   | 13.865079642 |
| 3.632881189  | -5.196115848  | 13.928399103 |
| 30.106365033 | 7.588801810   | 13.958402862 |
| 11.129501428 | 7.617721448   | 13.981080161 |
| 14.967138870 | -3.289257764  | 16.523286979 |
| 18.810157560 | -3.259137292  | 16.639833296 |
| 16.828839034 | 0.015739488   | 16.765888100 |
| 22.610304277 | -3.147452054  | 16.854963390 |
| 24.494504898 | 0.162854357   | 16.856326722 |
| 20.594586755 | 6.646407498   | 16.913295193 |
| 18.695822690 | 3.365206552   | 16.917464156 |
| 11.238911278 | -10.093732516 | 16.922491298 |
| 20.726113153 | -6.556176099  | 16.925920531 |
| 30.268762686 | 3.364902315   | 16.929115187 |
| 14.952596203 | 3.373264995   | 16.931102122 |
| 26.378691304 | 3.371766126   | 16.932193717 |
| 22.488617432 | 3.372654447   | 16.939674624 |
| 11.209350621 | 3.383879060   | 16.942830959 |
| 15.114232736 | -10.080704594 | 16.956859112 |
| 13.078953869 | 6.690749776   | 16.973653413 |
| 18.841929827 | -9.993234687  | 17.017723647 |
| 28.262888262 | 6.559419453   | 17.023685612 |
| 9.307950721  | 0.205220371   | 17.023723934 |
| 26.410433272 | -2.975480068  | 17.025789835 |
| 7.415816961  | -10.004534671 | 17.026023251 |
| 7.401261256  | -2.873262483  | 17.089381034 |
| 22.569594345 | -9.961258442  | 17.119346470 |
| 3.592730149  | -9.932365695  | 17.142063253 |
| 5.578629077  | 1.430840124   | 0.817268476  |
| 9.502437408  | 1.514896530   | 0.879146147  |
| 13.127995366 | 8.358002731   | 0.992653418  |
| 5.531623380  | 8.387196919   | 1.076663680  |
| 20.787461480 | 8.458662179   | 1.129618217  |
| 16.904608411 | 14.816907005  | 1.172948141  |
| 9.300014816  | 14.868709566  | 1.181598593  |
| 24.547606508 | 14.861475503  | 1.233656920  |
| 3.647440563  | 4.683102495   | 1.364698802  |
| 16.876248504 | 1.877330558   | 1.372336045  |
| 20.800053711 | 1.911242485   | 1.471036385  |
| 1.763255575  | 1.103857413   | 1.560969420  |
| 9.347009143  | 3.753693205   | 3.978251060  |
| 13.270817302 | 3.837775626   | 4.040089901  |
| 16.896376025 | 10.680881975  | 4.153597172  |

|              |              |              |
|--------------|--------------|--------------|
| 9.300003698  | 10.710050300 | 4.237646482  |
| 24.555852920 | 10.781534705 | 4.290600729  |
| 9.367836700  | -2.733179807 | 4.333930942  |
| 1.763243982  | -2.681377104 | 4.342581250  |
| 17.010846517 | -2.688566041 | 4.394600674  |
| 7.415821222  | 7.005981739  | 4.525642556  |
| 20.644628826 | 4.200183347  | 4.533318847  |
| 24.568445489 | 4.234115507  | 4.632019042  |
| 5.531614017  | 3.426736309  | 4.721913029  |
| 13.115389802 | 6.076572353  | 7.139194959  |
| 17.039197624 | 6.160628415  | 7.201072703  |
| 20.664755666 | 13.003734763 | 7.314579974  |
| 13.068383680 | 13.032929240 | 7.398589800  |
| 28.324233243 | 13.104413453 | 7.451544338  |
| 13.136217112 | -0.410300709 | 7.494874261  |
| 5.531635484  | -0.358478596 | 7.503525149  |
| 20.779227008 | -0.365712763 | 7.555583185  |
| 11.184201204 | 9.328834720  | 7.686625067  |
| 24.413009486 | 6.523062495  | 7.694262746  |
| 28.336826148 | 6.556994847  | 7.792962651  |
| 9.300016984  | 5.749588906  | 7.882896121  |
| 16.883780899 | 8.399445471  | 10.300177471 |
| 20.807589401 | 8.483501917  | 10.362054634 |
| 13.127996610 | -4.546306239 | 10.475523583 |
| 5.531623602  | -4.517137914 | 10.559572892 |
| 20.787461109 | -4.445672713 | 10.612526849 |
| 16.904620077 | 1.912552183  | 10.655857353 |
| 9.300015466  | 1.964374385  | 10.664507661 |
| 24.547607499 | 1.957166281  | 10.716526794 |
| 14.952592641 | 11.651733220 | 10.847569257 |
| 28.181389808 | 8.845915476  | 10.855245258 |
| 9.253001194  | 8.879847828  | 10.953945162 |
| 13.068396966 | 8.072468038  | 11.043839149 |
| 20.652161221 | 10.722298067 | 13.461160563 |
| 24.575969724 | 10.806379896 | 13.522999404 |
| 16.896375654 | -2.223453495 | 13.636506675 |
| 9.300003668  | -2.194259018 | 13.720516501 |
| 24.555841431 | -2.122793966 | 13.773470458 |
| 20.672988362 | 4.235450476  | 13.816800962 |
| 13.068395448 | 4.287253132  | 13.825451270 |
| 28.315997914 | 4.280039014  | 13.877509886 |
| 7.415821364  | -5.898353450 | 14.008551188 |
| 20.644630133 | -8.704125416 | 14.016188867 |
| 1.716240563  | -8.670193397 | 14.114888771 |
| 16.836788403 | 10.395340772 | 14.204822241 |
| 13.115389431 | -6.827762924 | 16.622104172 |
| 17.039197421 | -6.743706182 | 16.683981335 |
| 20.664755976 | 0.099399871  | 16.797488606 |
| 13.068383990 | 0.128593578  | 16.881499593 |
| 28.324233545 | 0.200079360  | 16.934453550 |
| 24.441392514 | 6.558304257  | 16.977784054 |
| 16.836787225 | 6.610125866  | 16.986434362 |
| 32.084378236 | 6.602917762  | 17.038453495 |
| 11.184201173 | -3.575474406 | 17.169494796 |
| 24.413009114 | -6.381272782 | 17.177171959 |
| 5.484620841  | -6.347340430 | 17.275871863 |

|              |               |              |
|--------------|---------------|--------------|
| 3.523099390  | -23.515437313 | 38.777817853 |
| 7.492595245  | -23.033833282 | 38.926783371 |
| 13.073975322 | 18.787568699  | 0.047031706  |
| 5.530142378  | 6.046797140   | 0.136341297  |
| 13.180519564 | 6.037737816   | 0.182242991  |
| 11.419870594 | 2.819503014   | 0.183100245  |
| 16.943979656 | 18.916165238  | 0.228378490  |
| 11.231123640 | 16.037522581  | 0.234690942  |
| 7.510943085  | 9.505649993   | 0.238704421  |
| 18.781474632 | 9.523142112   | 0.238938218  |
| 15.133966904 | 9.525972472   | 0.242795833  |
| 9.284144039  | 12.598953853  | 0.249264149  |
| 20.727743135 | 19.065310477  | 0.253043832  |
| 11.097463197 | 9.490928662   | 0.254329703  |
| 26.404511174 | 9.520975619   | 0.259551122  |
| 14.925294968 | 15.919894026  | 0.259745944  |
| 22.817994540 | 9.501659693   | 0.268941867  |
| 9.343840130  | 6.086298503   | 0.293061701  |
| 24.618596704 | 12.592681743  | 0.305569697  |
| 14.958829158 | 2.931233196   | 0.335183703  |
| 18.924457458 | 15.922729412  | 0.336625458  |
| 16.903700826 | 12.517553045  | 0.337326829  |
| 20.803237733 | 6.124913371   | 0.345626542  |
| 30.221099886 | 16.121504953  | 0.348977607  |
| 16.966550204 | 6.216195366   | 0.425038824  |
| 22.527759405 | 15.989919967  | 0.428078160  |
| 24.616937149 | 6.262655465   | 0.430143335  |
| 18.886092727 | 3.129874936   | 0.444171017  |
| 26.526921314 | 16.062459368  | 0.453756620  |
| 13.065231660 | 12.702102606  | 0.454419016  |
| 28.399696551 | 12.757706156  | 0.465251497  |
| 20.780138623 | 12.649320534  | 0.516647391  |
| 24.492847228 | 19.331199529  | 0.614880137  |
| 28.276626497 | 19.310222163  | 0.764586692  |
| 20.841484368 | -0.428078665  | 0.941491375  |
| 22.855589602 | 3.128204353   | 0.948271455  |
| 7.291479540  | 4.616093894   | 2.972972740  |
| 11.260975054 | 5.097697541   | 3.121938839  |
| 5.537204040  | 1.237508260   | 3.207975374  |
| 9.298533478  | 8.369669636   | 3.297323853  |
| 16.948910661 | 8.360610802   | 3.343225702  |
| 15.188250404 | 5.142356123   | 3.344083010  |
| 9.407208034  | 1.366104566   | 3.389322063  |
| 3.694352317  | -1.512538308  | 3.395634732  |
| 11.279322730 | 11.828502346  | 3.399686987  |
| 22.549866073 | 11.846040428  | 3.399881790  |
| 18.902347226 | 11.848851160  | 3.403739533  |
| 13.052535646 | 14.921852702  | 3.410207812  |
| 13.190972195 | 1.515224003   | 3.414026361  |
| 14.865854637 | 11.813826978  | 3.415273276  |
| 30.172891834 | 11.843829060  | 3.420533834  |
| 7.388523733  | -1.630193074  | 3.420728637  |
| 26.586375199 | 11.824538985  | 3.429885549  |
| 13.112220452 | 8.409151400   | 3.454044340  |
| 28.386975664 | 14.915560371  | 3.466513487  |
| 18.727221104 | 5.254106586   | 3.496166251  |



|              |              |             |
|--------------|--------------|-------------|
| 11.387686476 | -1.627357125 | 3.497607969 |
| 20.672080467 | 14.840406002 | 3.498309377 |
| 24.571618055 | 8.447766207  | 3.506609271 |
| 22.684328861 | -1.428581849 | 3.509960409 |
| 20.734930526 | 8.539048155  | 3.586021626 |
| 14.990998178 | -1.560147025 | 3.589060672 |
| 28.385328926 | 8.585554253  | 3.591087090 |
| 22.654473218 | 5.452753956  | 3.605114662 |
| 18.990172041 | -1.487627412 | 3.614739276 |
| 16.833634798 | 15.024955419 | 3.615401781 |
| 32.168075511 | 15.080559065 | 3.626234117 |
| 24.548518945 | 14.972173491 | 3.677629938 |
| 16.956074589 | 1.781112426  | 3.775862722 |
| 20.739855557 | 1.760161324  | 3.925530519 |
| 24.609863497 | 1.894800330  | 4.102435056 |
| 26.623969924 | 5.451057286  | 4.109254040 |
| 11.059859862 | 6.938946876  | 6.133955251 |
| 15.029366832 | 7.420570659  | 6.282921351 |
| 9.305595817  | 3.560381186  | 6.368958176 |
| 13.066914133 | 10.692549568 | 6.458267462 |
| 20.717290983 | 10.683489358 | 6.504169601 |
| 18.956631407 | 7.465234870  | 6.505026619 |
| 13.175599643 | 3.688977388  | 6.550304575 |
| 7.462732510  | 0.810315043  | 6.556617244 |
| 15.047714167 | 14.151401231 | 6.560630596 |
| 26.318247069 | 14.168894402 | 6.560864592 |
| 22.670739004 | 14.171724085 | 6.564722334 |
| 5.515764029  | -2.628234545 | 6.571190614 |
| 16.959363123 | 3.838122591  | 6.574969970 |
| 18.634234278 | 14.136679767 | 6.576256078 |
| 11.089068241 | 14.166707616 | 6.581477733 |
| 11.156903501 | 0.692685896  | 6.581672246 |
| 30.354766976 | 14.147411911 | 6.590868351 |
| 16.880600093 | 10.732030148 | 6.614987949 |
| 20.850216010 | -2.634506250 | 6.627495999 |
| 22.495601426 | 7.576985142  | 6.657110150 |
| 15.156078127 | 0.695541346  | 6.658551868 |
| 13.135309780 | -2.709654441 | 6.659253276 |
| 28.340008471 | 10.770665092 | 6.667552880 |
| 3.600513916  | 0.894317080  | 6.670903727 |
| 24.503310848 | 10.861926903 | 6.746965234 |
| 18.759378711 | 0.762732093  | 6.750004281 |
| 9.301503972  | 10.908407234 | 6.752069601 |
| 26.422852178 | 7.775606937  | 6.766097174 |
| 22.758552321 | 0.835251261  | 6.775682885 |
| 9.296863176  | -2.525105276 | 6.776345390 |
| 1.779111090  | -2.469481493 | 6.787177726 |
| 17.011746474 | -2.577887693 | 6.838573838 |
| 20.724466198 | 4.104011015  | 6.936806330 |
| 24.508236048 | 4.083014409  | 7.086513321 |
| 5.526051360  | 4.217673256  | 7.263417858 |
| 7.540156762  | 7.773956571  | 7.270197939 |
| 14.828251299 | 9.261845760  | 9.294898860 |
| 18.797747154 | 9.743449022  | 9.443865540 |
| 13.073975121 | 5.883259341  | 9.529901785 |
| 16.835294115 | 13.015402165 | 9.619250554 |

|              |              |              |
|--------------|--------------|--------------|
| 24.485671305 | 13.006342339 | 9.665152113  |
| 22.725010367 | 9.788087851  | 9.666009130  |
| 16.943979285 | 6.011855751  | 9.711248764  |
| 11.231124287 | 3.133188161  | 9.717599755  |
| 7.510943395  | -3.398685320 | 9.721613688  |
| 18.781497585 | -3.381166886 | 9.721808201  |
| 15.133966701 | -3.378336610 | 9.725665943  |
| 9.284144179  | -0.305355501 | 9.732134223  |
| 20.727743445 | 6.160975188  | 9.735953062  |
| 11.097463507 | -3.413406399 | 9.737238589  |
| 3.552295600  | -3.383378758 | 9.742459664  |
| 14.925295278 | 3.015559013  | 9.742654757  |
| 22.817995699 | -3.402648992 | 9.751811379  |
| 20.648991870 | 13.054903265 | 9.775970460  |
| 24.618596332 | -0.311627887 | 9.788440188  |
| 26.263981748 | 9.899837738  | 9.818093243  |
| 18.924458786 | 3.018394919  | 9.819534380  |
| 16.903690018 | -0.386801608 | 9.820235787  |
| 32.108388793 | 13.093518073 | 9.828535391  |
| 7.368894919  | 3.217169676  | 9.831886819  |
| 28.271702626 | 13.184800021 | 9.907947746  |
| 22.527782189 | 3.085585074  | 9.910986792  |
| 13.069883102 | 13.231285982 | 9.913013210  |
| 30.191243955 | 10.098505437 | 9.927041363  |
| 26.526932980 | 3.158104450  | 9.936665977  |
| 13.065254785 | -0.202232455 | 9.937327902  |
| 5.547491240  | -0.146628216 | 9.948160237  |
| 20.780138252 | -0.255014960 | 9.999556930  |
| 24.492846857 | 6.426864588  | 10.097788842 |
| 28.276627488 | 6.405912701  | 10.247456930 |
| 9.294429983  | 6.540551412  | 10.424361467 |
| 11.308536062 | 10.096809552 | 10.431180450 |
| 18.596630940 | 11.584698357 | 12.455881952 |
| 11.260975448 | -7.806637204 | 12.604847471 |
| 16.842356117 | 8.206113122  | 12.690884877 |
| 9.298523006  | -4.534684594 | 12.780233066 |
| 16.948910626 | -4.543698308 | 12.826096302 |
| 15.188250756 | -7.761953314 | 12.826953320 |
| 20.712359607 | 8.334708732  | 12.872231276 |
| 14.999503591 | 5.456065932  | 12.878543945 |
| 11.279323036 | -1.075806572 | 12.882557297 |
| 22.549878076 | -1.058313609 | 12.882790713 |
| 18.902347192 | -1.055483333 | 12.886648455 |
| 13.052524501 | 2.017497480  | 12.893116734 |
| 24.496123767 | 8.483853936  | 12.896896671 |
| 14.865843829 | -1.090527651 | 12.898182198 |
| 7.320686867  | -1.060479873 | 12.903403272 |
| 18.693674919 | 5.338437761  | 12.903598366 |
| 26.586376190 | -1.079796100 | 12.912794471 |
| 13.112221099 | -4.495157134 | 12.936914069 |
| 28.386976655 | 2.011225478  | 12.949422119 |
| 18.727220732 | -7.650203116 | 12.979036851 |
| 22.692837409 | 5.341273075  | 12.980477989 |
| 20.672080770 | 1.936071717  | 12.981218880 |
| 24.571617852 | -4.456542622 | 12.989479000 |
| 11.137274901 | 5.540048424  | 12.992830428 |

|              |              |              |
|--------------|--------------|--------------|
| 20.734930323 | -4.365286826 | 13.068930838 |
| 26.296150811 | 5.408483959  | 13.071930401 |
| 5.533123447  | -4.318780728 | 13.073996302 |
| 22.654472931 | -7.451580788 | 13.088023294 |
| 30.295324421 | 5.481002743  | 13.097609586 |
| 16.833634427 | 2.120646293  | 13.098271511 |
| 9.315871559  | 2.176251124  | 13.109103846 |
| 24.548518574 | 2.067863788  | 13.160500539 |
| 28.261227179 | 8.749743336  | 13.258732451 |
| 32.045008484 | 8.728767251  | 13.408438861 |
| 13.062810638 | 8.863405193  | 13.585344559 |
| 3.771764529  | -7.453251588 | 13.592124059 |
| 11.059860000 | -5.965362339 | 15.616825561 |
| 15.029367141 | -5.483764618 | 15.765830563 |
| 9.305584882  | -9.343948091 | 15.851828486 |
| 13.066914103 | -2.211785709 | 15.941176675 |
| 20.717290949 | -2.220844943 | 15.987078233 |
| 18.956631036 | -5.439100022 | 15.987935251 |
| 13.175588238 | -9.215351519 | 16.033174884 |
| 18.767884587 | 7.778920482  | 16.039525875 |
| 15.047703695 | 1.247046617  | 16.043540389 |
| 26.318246697 | 1.264559125  | 16.043773805 |
| 22.670727851 | 1.267396007  | 16.047592064 |
| 16.820915597 | 4.340396365  | 16.054060343 |
| 16.959362920 | -9.066212774 | 16.057879763 |
| 18.634235943 | 1.232345674  | 16.059165290 |
| 11.089067189 | 1.262372723  | 16.064386365 |
| 22.462055923 | 7.661290358  | 16.064581458 |
| 7.502550384  | 1.243082648  | 16.073738080 |
| 16.880600740 | -2.172304537 | 16.097897161 |
| 9.303150934  | 4.334104226  | 16.110365728 |
| 22.495601055 | -5.327349751 | 16.140018782 |
| 26.461229187 | 7.664145808  | 16.141461081 |
| 24.440461092 | 4.258950465  | 16.142162488 |
| 5.487803844  | -2.133670185 | 16.150462092 |
| 14.905666338 | 7.862921157  | 16.153813520 |
| 24.503310814 | -2.042407782 | 16.229874447 |
| 30.064552927 | 7.731336555  | 16.232913493 |
| 9.301503597  | -1.995901684 | 16.234939911 |
| 3.570648229  | -5.128701596 | 16.248966903 |
| 11.211498700 | 7.803856108  | 16.258591517 |
| 20.602016104 | 4.443500074  | 16.259254603 |
| 13.084251881 | 4.499103720  | 16.270086938 |
| 28.316898896 | 4.390717153  | 16.321482469 |
| 20.724467441 | -8.800323818 | 16.419715543 |
| 1.656031846  | -8.821294954 | 16.569383631 |
| 5.526039021  | -8.686656095 | 16.746288168 |
| 7.540156050  | -5.130378707 | 16.753107151 |

## CdS (100) surface: Structural parameters (VASP)

Cd S

1.0

|               |               |               |
|---------------|---------------|---------------|
| 8.3121795654  | 0.0000000000  | 0.0000000000  |
| 0.0000000000  | 13.5200080872 | 0.0000000000  |
| 12.4682638491 | 0.0000000000  | 36.5956770618 |

48 48

Cartesian

|              |              |              |
|--------------|--------------|--------------|
| 0.000000000  | 0.001230321  | 0.000000000  |
| 2.078036350  | 3.381232160  | 1.199752678  |
| 2.078048500  | 0.001230321  | 3.599294571  |
| 4.156084912  | 3.381232160  | 4.799047249  |
| 4.156084552  | 0.001230321  | 7.198552606  |
| 6.234120902  | 3.381232160  | 8.398305284  |
| 6.234133299  | 0.001230321  | 10.797847722 |
| 4.156079635  | 3.381232160  | 11.997599855 |
| 8.312177278  | 0.001230321  | 14.397105211 |
| 6.234136418  | 3.381232160  | 15.596894426 |
| 6.234136073  | 0.001230321  | 17.996399782 |
| 8.312172346  | 3.381232160  | 19.196151915 |
| 0.000000000  | 6.761234585  | 0.000000000  |
| 2.078036350  | 10.141236606 | 1.199752678  |
| 2.078048500  | 6.761234585  | 3.599294571  |
| 4.156084912  | 10.141236606 | 4.799047249  |
| 4.156084552  | 6.761234585  | 7.198552606  |
| 6.234120902  | 10.141236606 | 8.398305284  |
| 6.234133299  | 6.761234585  | 10.797847722 |
| 4.156079635  | 10.141236606 | 11.997599855 |
| 8.312177278  | 6.761234585  | 14.397105211 |
| 6.234136418  | 10.141236606 | 15.596894426 |
| 6.234136073  | 6.761234585  | 17.996399782 |
| 8.312172346  | 10.141236606 | 19.196151915 |
| 4.156089783  | 0.001230321  | 0.000000000  |
| 6.234126257  | 3.381232160  | 1.199752678  |
| 6.234138221  | 0.001230321  | 3.599294571  |
| 8.312174695  | 3.381232160  | 4.799047249  |
| 8.312174211  | 0.001230321  | 7.198552606  |
| 10.390210685 | 3.381232160  | 8.398305284  |
| 10.390231257 | 0.001230321  | 10.797847722 |
| 8.312177763  | 3.381232160  | 11.997599855 |
| 12.468267061 | 0.001230321  | 14.397105211 |
| 10.390226201 | 3.381232160  | 15.596894426 |
| 10.390225716 | 0.001230321  | 17.996399782 |
| 12.468262005 | 3.381232160  | 19.196151915 |
| 4.156089783  | 6.761234585  | 0.000000000  |
| 6.234126257  | 10.141236606 | 1.199752678  |
| 6.234138221  | 6.761234585  | 3.599294571  |
| 8.312174695  | 10.141236606 | 4.799047249  |
| 8.312174211  | 6.761234585  | 7.198552606  |
| 10.390210685 | 10.141236606 | 8.398305284  |
| 10.390231257 | 6.761234585  | 10.797847722 |
| 8.312177763  | 10.141236606 | 11.997599855 |
| 12.468267061 | 6.761234585  | 14.397105211 |
| 10.390226201 | 10.141236606 | 15.596894426 |

|              |              |              |
|--------------|--------------|--------------|
| 10.390225716 | 6.761234585  | 17.996399782 |
| 12.468262005 | 10.141236606 | 19.196151915 |
| 0.000000000  | 2.547291212  | 0.000000000  |
| 2.078036350  | 5.927293234  | 1.199752678  |
| 2.078048500  | 2.547291212  | 3.599294571  |
| 4.156084912  | 5.927293234  | 4.799047249  |
| 4.156084552  | 2.547291212  | 7.198552606  |
| 6.234120902  | 5.927293234  | 8.398305284  |
| 6.234133299  | 2.547291212  | 10.797847722 |
| 4.156079635  | 5.927293234  | 11.997599855 |
| 8.312177278  | 2.547291212  | 14.397105211 |
| 6.234136418  | 5.927293234  | 15.596894426 |
| 6.234136073  | 2.547291212  | 17.996399782 |
| 8.312172346  | 5.927293234  | 19.196151915 |
| 0.000000000  | 9.307294853  | 0.000000000  |
| 2.078036350  | 12.687296875 | 1.199752678  |
| 2.078048500  | 9.307294853  | 3.599294571  |
| 4.156084912  | 12.687296875 | 4.799047249  |
| 4.156084552  | 9.307294853  | 7.198552606  |
| 6.234120902  | 12.687296875 | 8.398305284  |
| 6.234133299  | 9.307294853  | 10.797847722 |
| 4.156079635  | 12.687296875 | 11.997599855 |
| 8.312177278  | 9.307294853  | 14.397105211 |
| 6.234136418  | 12.687296875 | 15.596894426 |
| 6.234136073  | 9.307294853  | 17.996399782 |
| 8.312172346  | 12.687296875 | 19.196151915 |
| 4.156089783  | 2.547291212  | 0.000000000  |
| 6.234126257  | 5.927293234  | 1.199752678  |
| 6.234138221  | 2.547291212  | 3.599294571  |
| 8.312174695  | 5.927293234  | 4.799047249  |
| 8.312174211  | 2.547291212  | 7.198552606  |
| 10.390210685 | 5.927293234  | 8.398305284  |
| 10.390231257 | 2.547291212  | 10.797847722 |
| 8.312177763  | 5.927293234  | 11.997599855 |
| 12.468267061 | 2.547291212  | 14.397105211 |
| 10.390226201 | 5.927293234  | 15.596894426 |
| 10.390225716 | 2.547291212  | 17.996399782 |
| 12.468262005 | 5.927293234  | 19.196151915 |
| 4.156089783  | 9.307294853  | 0.000000000  |
| 6.234126257  | 12.687296875 | 1.199752678  |
| 6.234138221  | 9.307294853  | 3.599294571  |
| 8.312174695  | 12.687296875 | 4.799047249  |
| 8.312174211  | 9.307294853  | 7.198552606  |
| 10.390210685 | 12.687296875 | 8.398305284  |
| 10.390231257 | 9.307294853  | 10.797847722 |
| 8.312177763  | 12.687296875 | 11.997599855 |
| 12.468267061 | 9.307294853  | 14.397105211 |
| 10.390226201 | 12.687296875 | 15.596894426 |
| 10.390225716 | 9.307294853  | 17.996399782 |
| 12.468262005 | 12.687296875 | 19.196151915 |

## ZnS (110) surface: Structural parameters (VASP)

Zn S

1.0

|               |               |               |
|---------------|---------------|---------------|
| 10.7748718262 | 0.0000000000  | 0.0000000000  |
| 0.0000000000  | 15.2379703522 | 0.0000000000  |
| 0.0000000000  | 22.8569548267 | 42.8569553302 |

96 96

Cartesian

|             |              |              |
|-------------|--------------|--------------|
| 2.686337101 | 5.696303874  | 0.009771386  |
| 5.378923765 | 7.625232767  | 1.915277409  |
| 5.390593128 | 11.423921875 | 1.900105911  |
| 2.691627651 | 5.713728381  | 3.811911950  |
| 2.696777873 | 9.524089317  | 3.807111775  |
| 5.387985664 | 11.428104492 | 5.713817808  |
| 5.386153696 | 15.238396570 | 5.714889409  |
| 2.694181327 | 9.523975325  | 7.618681107  |
| 2.693491730 | 13.333078953 | 7.619152407  |
| 5.387274392 | 15.238091902 | 9.523843918  |
| 5.387511054 | 19.047485831 | 9.523629981  |
| 2.693750389 | 13.333277458 | 11.428536067 |
| 2.693750389 | 17.142777539 | 11.428407066 |
| 5.387274392 | 19.047592829 | 13.333099215 |
| 5.387511054 | 7.619007834  | 13.333355940 |
| 2.693491730 | 17.142564264 | 15.237790088 |
| 2.694181327 | 20.952429918 | 15.238261388 |
| 5.387985664 | 22.856588994 | 17.143124687 |
| 5.386153696 | 11.428904136 | 17.142096511 |
| 2.696777873 | 20.952574495 | 19.049831039 |
| 2.691627651 | 24.761198338 | 19.045031183 |
| 5.378923765 | 11.434717239 | 20.941665245 |
| 5.390593128 | 15.233413981 | 20.956879690 |
| 2.686337101 | 24.743773426 | 22.847170994 |
| 2.686337101 | 13.315288596 | 0.009771386  |
| 5.378923765 | 15.244217943 | 1.915277409  |
| 5.390593128 | 3.804936472  | 1.900105911  |
| 2.691627651 | 13.332713784 | 3.811911950  |
| 2.696777873 | 17.143074947 | 3.807111775  |
| 5.387985664 | 3.809119145  | 5.713817808  |
| 5.386153696 | 7.619411848  | 5.714889409  |
| 2.694181327 | 17.142960501 | 7.618681107  |
| 2.693491730 | 5.714094004  | 7.619152407  |
| 5.387274392 | 7.619106953  | 9.523843918  |
| 5.387511054 | 11.428500655 | 9.523629981  |
| 2.693750389 | 20.952262634 | 11.428536067 |
| 2.693750389 | 9.523792136  | 11.428407066 |
| 5.387274392 | 11.428607199 | 13.333099215 |
| 5.387511054 | 15.237992840 | 13.333355940 |
| 2.693491730 | 9.523578634  | 15.237790088 |
| 2.694181327 | 13.333444287 | 15.238261388 |
| 5.387985664 | 15.237604272 | 17.143124687 |
| 5.386153696 | 19.047889539 | 17.142096511 |
| 2.696777873 | 13.333589546 | 19.049831039 |
| 2.691627651 | 17.142213616 | 19.045031183 |
| 5.378923765 | 19.053702528 | 20.941665245 |
| 5.390593128 | 22.852398703 | 20.956879690 |

|              |              |              |
|--------------|--------------|--------------|
| 2.686337101  | 17.124773264 | 22.847170994 |
| 8.073773335  | 5.696303874  | 0.009771386  |
| 10.766359678 | 7.625232767  | 1.915277409  |
| 0.003157037  | 11.423921875 | 1.900105911  |
| 8.079063403  | 5.713728381  | 3.811911950  |
| 8.084214107  | 9.524089317  | 3.807111775  |
| 0.000549518  | 11.428104492 | 5.713817808  |
| 10.773589930 | 15.238396570 | 5.714889409  |
| 8.081616919  | 9.523975325  | 7.618681107  |
| 8.080927804  | 13.333078953 | 7.619152407  |
| 10.774709984 | 15.238091902 | 9.523843918  |
| 0.000075424  | 19.047485831 | 9.523629981  |
| 8.081185981  | 13.333277458 | 11.428536067 |
| 8.081185981  | 17.142777539 | 11.428407066 |
| 10.774709984 | 19.047592829 | 13.333099215 |
| 0.000075424  | 7.619007834  | 13.33355940  |
| 8.080927804  | 17.142564264 | 15.237790088 |
| 8.081616919  | 20.952429918 | 15.238261388 |
| 0.000549518  | 22.856588994 | 17.143124687 |
| 10.773589930 | 11.428904136 | 17.142096511 |
| 8.084214107  | 20.952574495 | 19.049831039 |
| 8.079063403  | 24.761198338 | 19.045031183 |
| 10.766359678 | 11.434717239 | 20.941665245 |
| 0.003157037  | 15.233413981 | 20.956879690 |
| 8.073773335  | 24.743773426 | 22.847170994 |
| 8.073773335  | 13.315288596 | 0.009771386  |
| 10.766359678 | 15.244217943 | 1.915277409  |
| 0.003157037  | 3.804936472  | 1.900105911  |
| 8.079063403  | 13.332713784 | 3.811911950  |
| 8.084214107  | 17.143074947 | 3.807111775  |
| 0.000549518  | 3.809119145  | 5.713817808  |
| 10.773589930 | 7.619411848  | 5.714889409  |
| 8.081616919  | 17.142960501 | 7.618681107  |
| 8.080927804  | 5.714094004  | 7.619152407  |
| 10.774709984 | 7.619106953  | 9.523843918  |
| 0.000075424  | 11.428500655 | 9.523629981  |
| 8.081185981  | 20.952262634 | 11.428536067 |
| 8.081185981  | 9.523792136  | 11.428407066 |
| 10.774709984 | 11.428607199 | 13.333099215 |
| 0.000075424  | 15.237992840 | 13.33355940  |
| 8.080927804  | 9.523578634  | 15.237790088 |
| 8.081616919  | 13.333444287 | 15.238261388 |
| 0.000549518  | 15.237604272 | 17.143124687 |
| 10.773589930 | 19.047889539 | 17.142096511 |
| 8.084214107  | 13.333589546 | 19.049831039 |
| 8.079063403  | 17.142213616 | 19.045031183 |
| 10.766359678 | 19.053702528 | 20.941665245 |
| 0.003157037  | 22.852398703 | 20.956879690 |
| 8.073773335  | 17.124773264 | 22.847170994 |
| 1.350824121  | 26.679079409 | 42.852668923 |
| 4.042882870  | 5.721057992  | 1.898434487  |
| 4.043378353  | 9.520272156  | 1.899420195  |
| 1.347570090  | 11.430161491 | 3.811569012  |
| 1.349110966  | 7.617407761  | 3.806254749  |
| 4.040458443  | 9.523556311  | 5.715789223  |
| 4.040910896  | 13.333376097 | 5.713603870  |

|             |              |              |
|-------------|--------------|--------------|
| 1.346934441 | 15.237886328 | 7.618466531  |
| 1.346848221 | 11.428576639 | 7.619409770  |
| 4.040587853 | 13.333269542 | 9.523587193  |
| 4.040555420 | 17.142663585 | 9.523972919  |
| 1.346858978 | 19.047454806 | 11.428621642 |
| 1.346858978 | 15.237954725 | 11.428321491 |
| 4.040587853 | 17.142739134 | 13.333355940 |
| 4.040555420 | 20.952147709 | 13.332970215 |
| 1.346848221 | 22.857054506 | 15.237576789 |
| 1.346934441 | 19.047363464 | 15.238519390 |
| 4.040458443 | 20.952041381 | 17.141153911 |
| 4.040910896 | 9.523891184  | 17.143339263 |
| 1.349110966 | 11.426900610 | 19.050731491 |
| 1.347570090 | 22.858646385 | 19.045373482 |
| 4.042882870 | 24.768520649 | 20.958551593 |
| 4.043378353 | 13.329772124 | 20.957522140 |
| 1.350824121 | 15.250602426 | 22.861271689 |
| 1.350824121 | 34.298064585 | 42.852668923 |
| 4.042882870 | 13.340042714 | 1.898434487  |
| 4.043378353 | 1.901287207  | 1.899420195  |
| 1.347570090 | 3.811176315  | 3.811569012  |
| 1.349110966 | 15.236392937 | 3.806254749  |
| 4.040458443 | 17.142541033 | 5.715789223  |
| 4.040910896 | 5.714391375  | 5.713603870  |
| 1.346934441 | 7.618901151  | 7.618466531  |
| 1.346848221 | 19.047562269 | 7.619409770  |
| 4.040587853 | 5.714284593  | 9.523587193  |
| 4.040555420 | 9.523677954  | 9.523972919  |
| 1.346858978 | 11.428470084 | 11.428621642 |
| 1.346858978 | 7.618969776  | 11.428321491 |
| 4.040587853 | 9.523754185  | 13.333355940 |
| 4.040555420 | 13.333162987 | 13.332970215 |
| 1.346848221 | 15.238069329 | 15.237576789 |
| 1.346934441 | 11.428378742 | 15.238519390 |
| 4.040458443 | 13.333056205 | 17.141153911 |
| 4.040910896 | 17.142875991 | 17.143339263 |
| 1.349110966 | 19.045870686 | 19.050731491 |
| 1.347570090 | 15.239661209 | 19.045373482 |
| 4.042882870 | 17.149535473 | 20.958551593 |
| 4.043378353 | 20.948757073 | 20.957522140 |
| 1.350824121 | 22.869587148 | 22.861271689 |
| 6.738260034 | 26.679079409 | 42.852668923 |
| 9.430318462 | 5.721057992  | 1.898434487  |
| 9.430814266 | 9.520272156  | 1.899420195  |
| 6.735005843 | 11.430161491 | 3.811569012  |
| 6.736546558 | 7.617407761  | 3.806254749  |
| 9.427894035 | 9.523556311  | 5.715789223  |
| 9.428346809 | 13.333376097 | 5.713603870  |
| 6.734370033 | 15.237886328 | 7.618466531  |
| 6.734283973 | 11.428576639 | 7.619409770  |
| 9.428023766 | 13.333269542 | 9.523587193  |
| 9.427991012 | 17.142663585 | 9.523972919  |
| 6.734294891 | 19.047454806 | 11.428621642 |
| 6.734294891 | 15.237954725 | 11.428321491 |
| 9.428023766 | 17.142739134 | 13.333355940 |
| 9.427991012 | 20.952147709 | 13.332970215 |



|             |              |              |
|-------------|--------------|--------------|
| 6.734283973 | 22.857054506 | 15.237576789 |
| 6.734370033 | 19.047363464 | 15.238519390 |
| 9.427894035 | 20.952041381 | 17.141153911 |
| 9.428346809 | 9.523891184  | 17.143339263 |
| 6.736546558 | 11.426900610 | 19.050731491 |
| 6.735005843 | 22.858646385 | 19.045373482 |
| 9.430318462 | 24.768520649 | 20.958551593 |
| 9.430814266 | 13.329772124 | 20.957522140 |
| 6.738260034 | 15.250602426 | 22.861271689 |
| 6.738260034 | 34.298064585 | 42.852668923 |
| 9.430318462 | 13.340042714 | 1.898434487  |
| 9.430814266 | 1.901287207  | 1.899420195  |
| 6.735005843 | 3.811176315  | 3.811569012  |
| 6.736546558 | 15.236392937 | 3.806254749  |
| 9.427894035 | 17.142541033 | 5.715789223  |
| 9.428346809 | 5.714391375  | 5.713603870  |
| 6.734370033 | 7.618901151  | 7.618466531  |
| 6.734283973 | 19.047562269 | 7.619409770  |
| 9.428023766 | 5.714284593  | 9.523587193  |
| 9.427991012 | 9.523677954  | 9.523972919  |
| 6.734294891 | 11.428470084 | 11.428621642 |
| 6.734294891 | 7.618969776  | 11.428321491 |
| 9.428023766 | 9.523754185  | 13.333355940 |
| 9.427991012 | 13.333162987 | 13.332970215 |
| 6.734283973 | 15.238069329 | 15.237576789 |
| 6.734370033 | 11.428378742 | 15.238519390 |
| 9.427894035 | 13.333056205 | 17.141153911 |
| 9.428346809 | 17.142875991 | 17.143339263 |
| 6.736546558 | 19.045870686 | 19.050731491 |
| 6.735005843 | 15.239661209 | 19.045373482 |
| 9.430318462 | 17.149535473 | 20.958551593 |
| 9.430814266 | 20.948757073 | 20.957522140 |
| 6.738260034 | 22.869587148 | 22.861271689 |
